# Supplementary material
Source: publisher figshare collection journal article supplement (https://plos.figshare.com/articles/dataset/_/4782574)
Supplement: Supplementary file 1 [file 2]

Archive with 24 entries (24 files):
- S1 Animal Supplement.pdf
- S1 Fig.tif
- S2 Fig.tif
- S3 Fig.tif
- S4 Fig.tif
- S5 Fig.tif
- S6 Fig.tif
- S7 Fig.tif
- S8 Fig.tif
- S9 Fig.tif
- S10 Fig.tif
- S11 Fig.tif
- S12 Fig.tif
- S13 Fig.tif
- S14 Fig.tif
- S15 Fig.tif
- S16 Fig.tif
- S17 Fig.tif
- S18 Fig.tif
- S19 Fig.tif
- S20 Fig.tif
- S21 Fig.tif
- S22 Fig.tif
- S23 Fig.tif
