# Supplementary material
Source: publisher figshare collection journal article supplement (https://plos.figshare.com/articles/dataset/_/4782574)

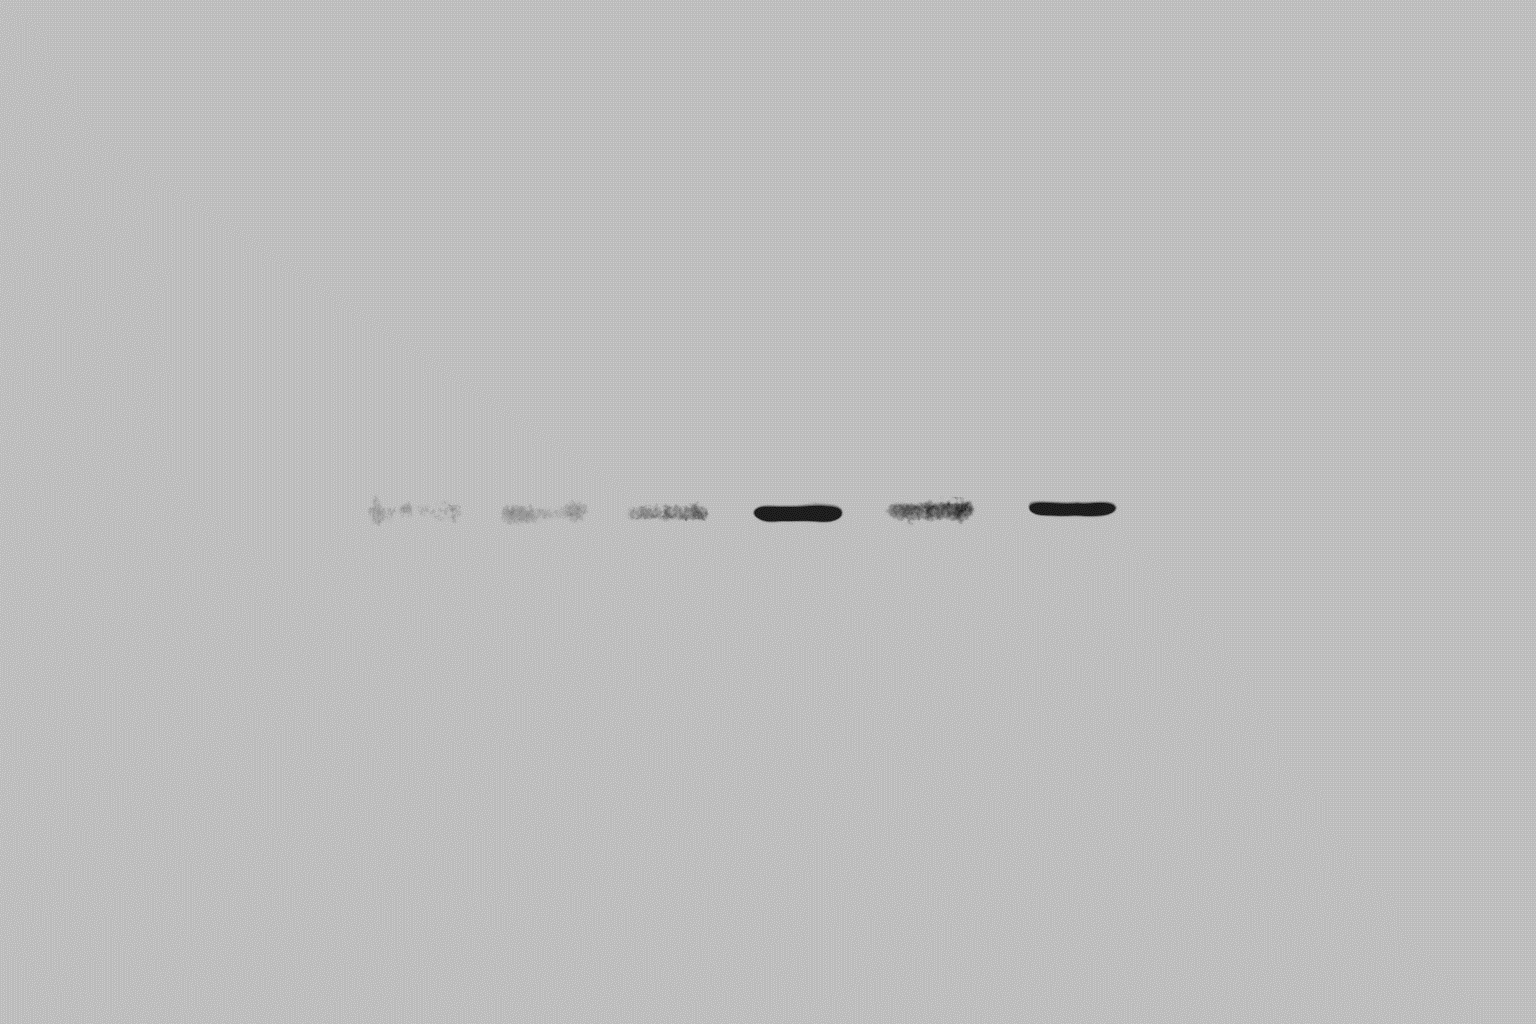

Supplement: Supplementary file 1 [file 2 › S1 Fig.tif]

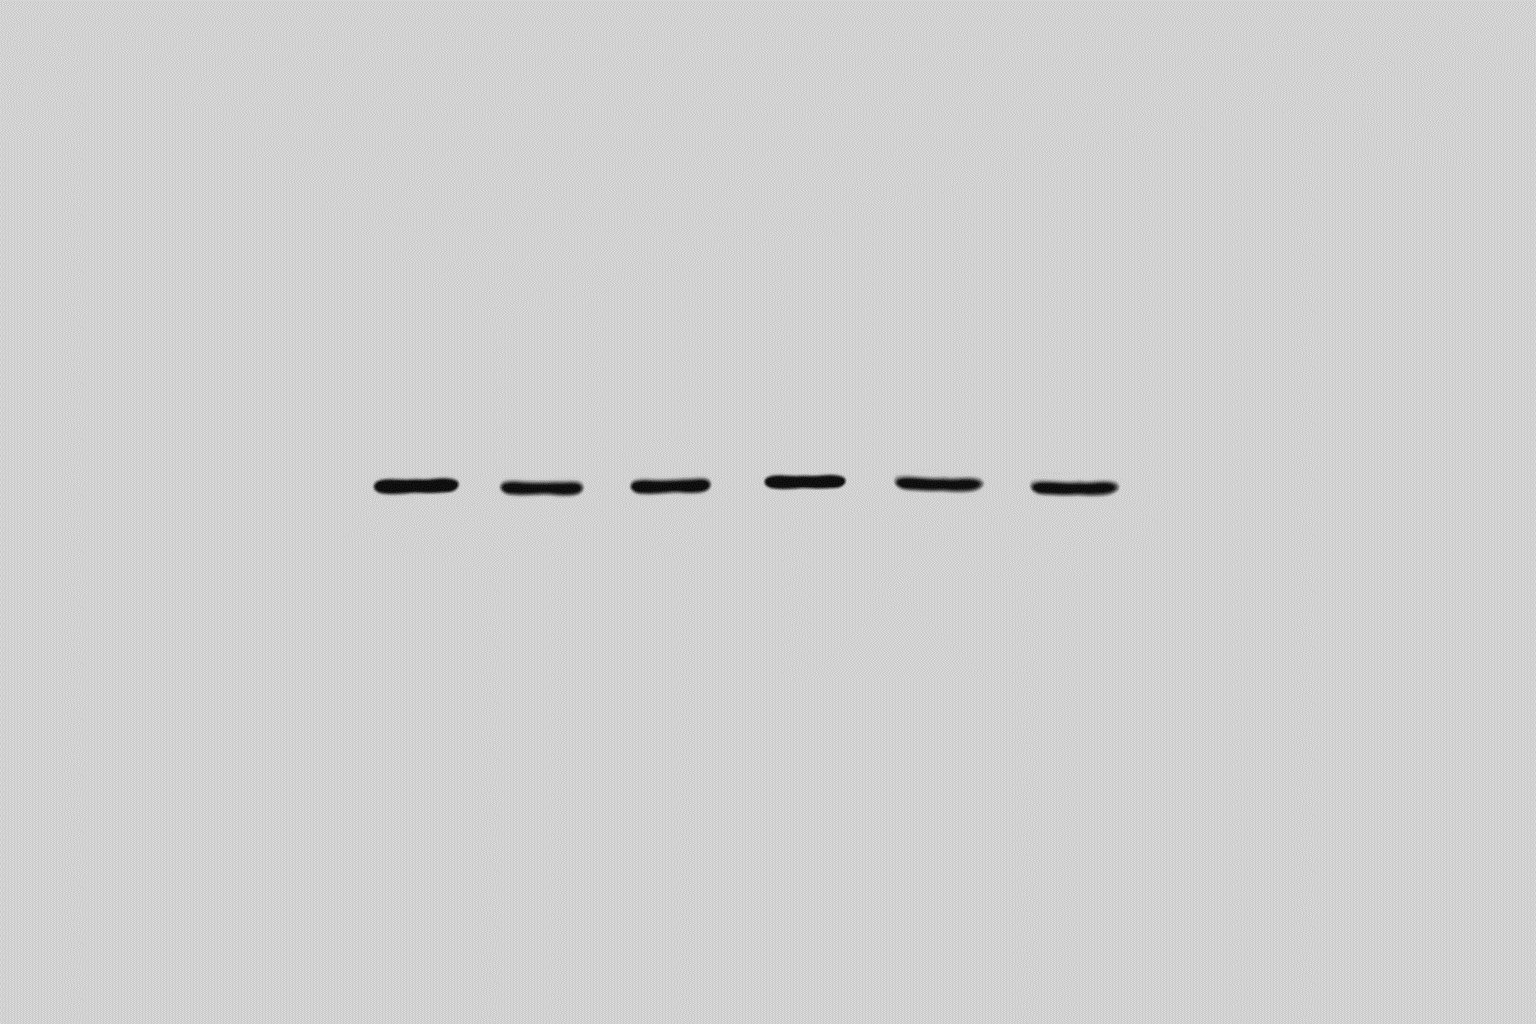

Supplement: Supplementary file 1 [file 2 › S2 Fig.tif]

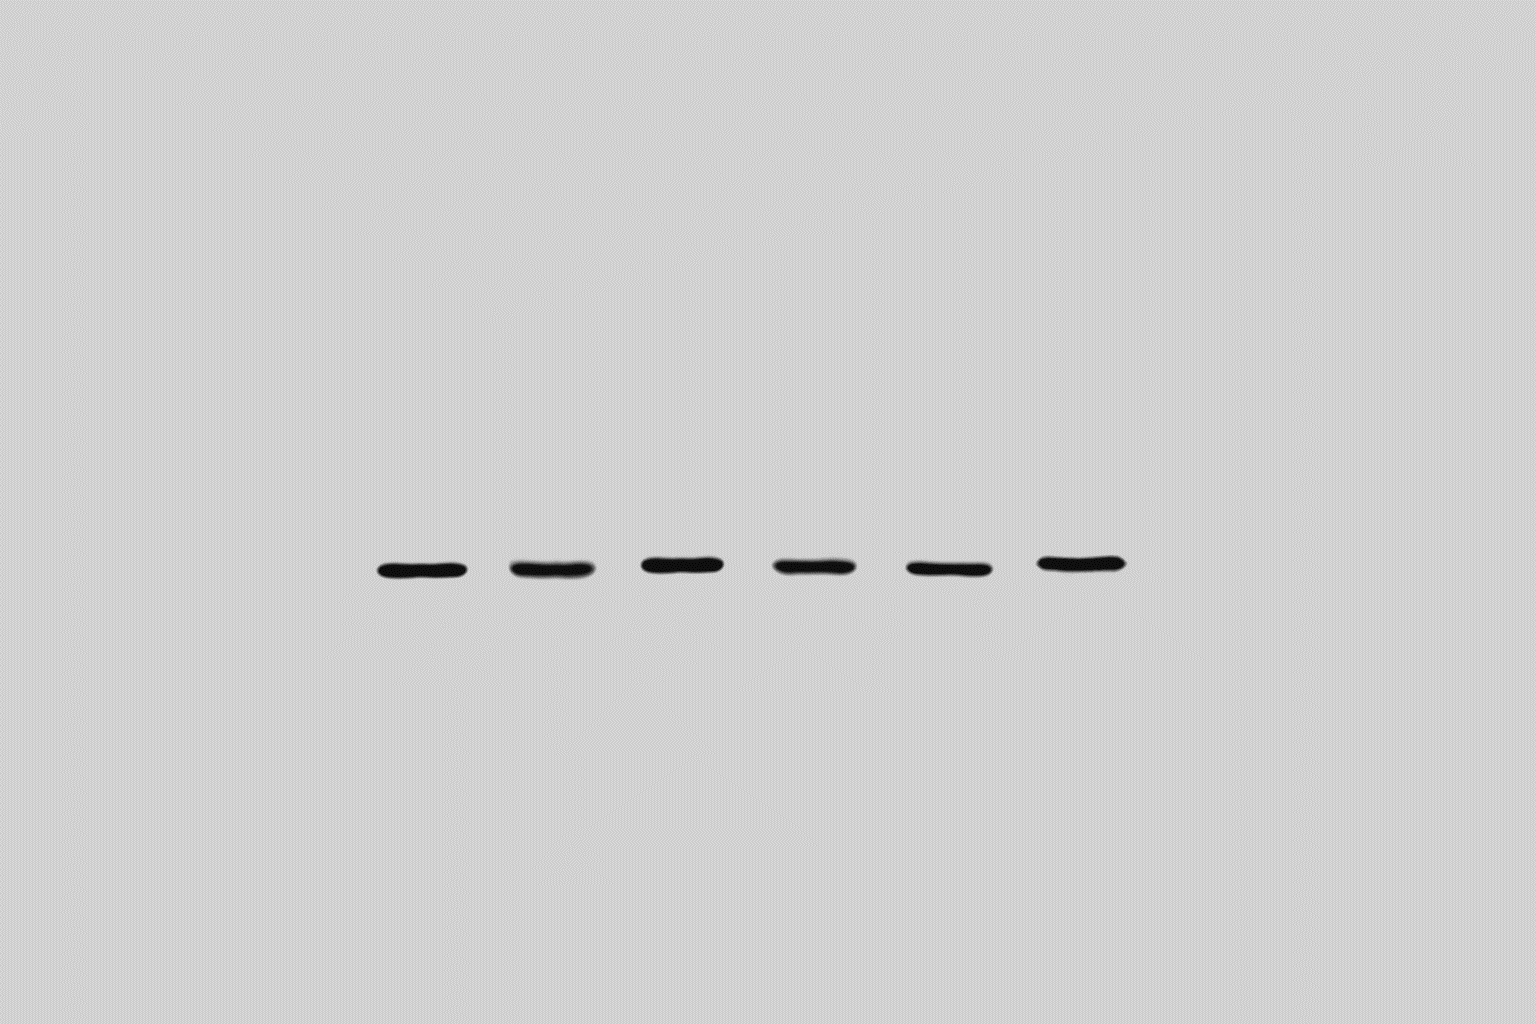

Supplement: Supplementary file 1 [file 2 › S3 Fig.tif]

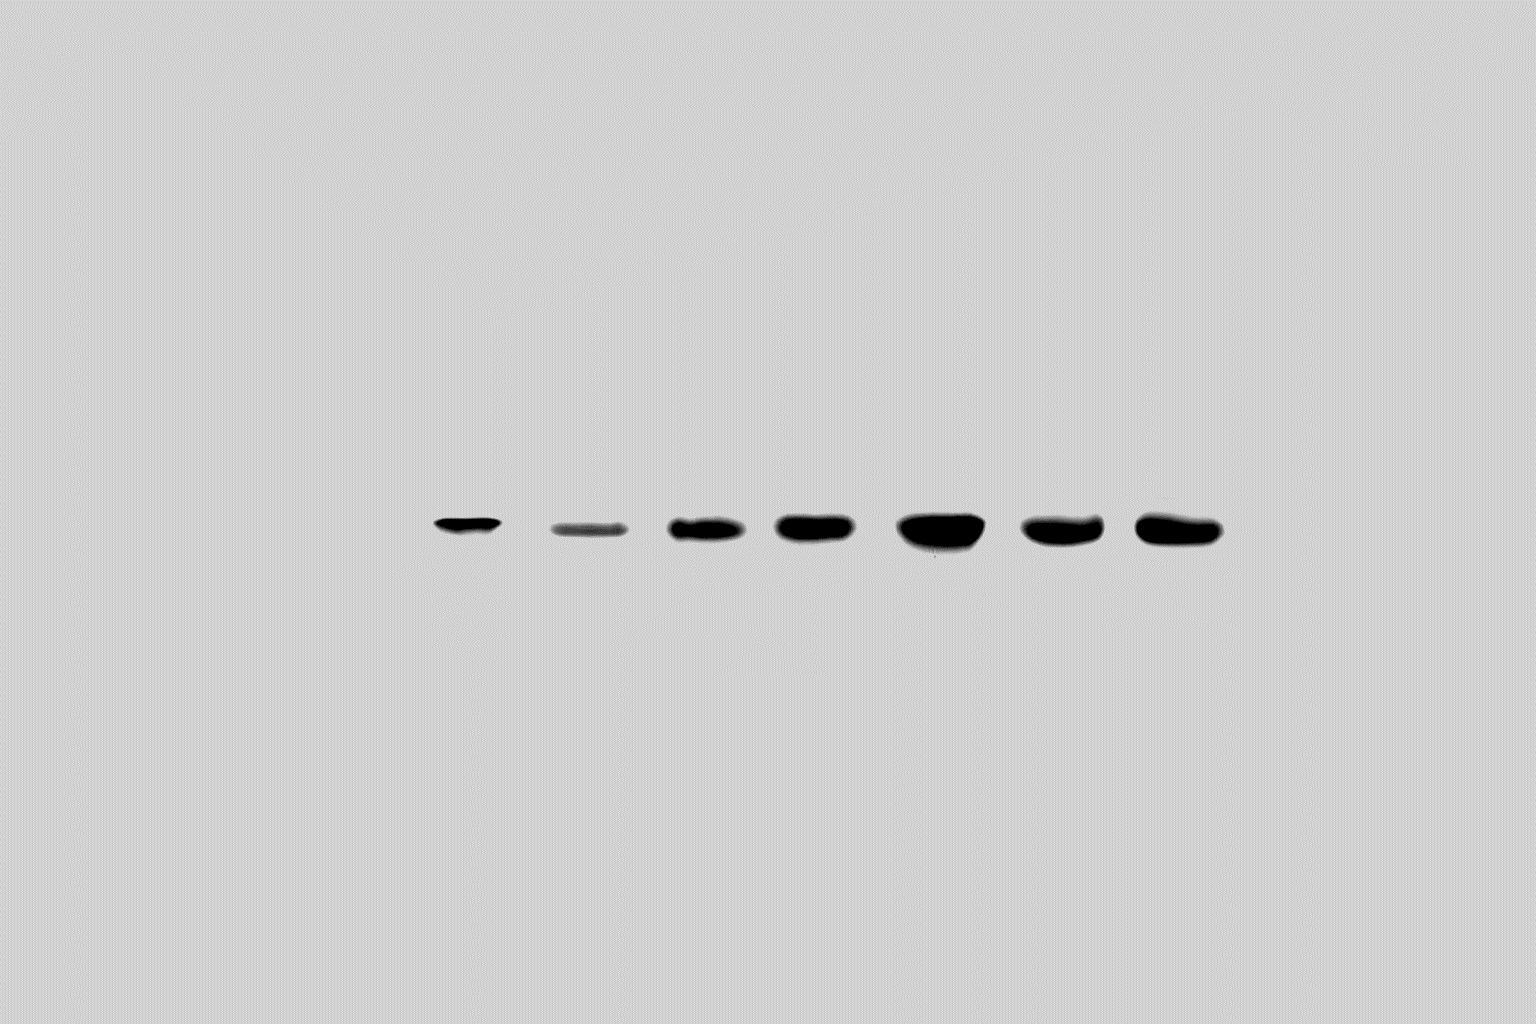

Supplement: Supplementary file 1 [file 2 › S4 Fig.tif]

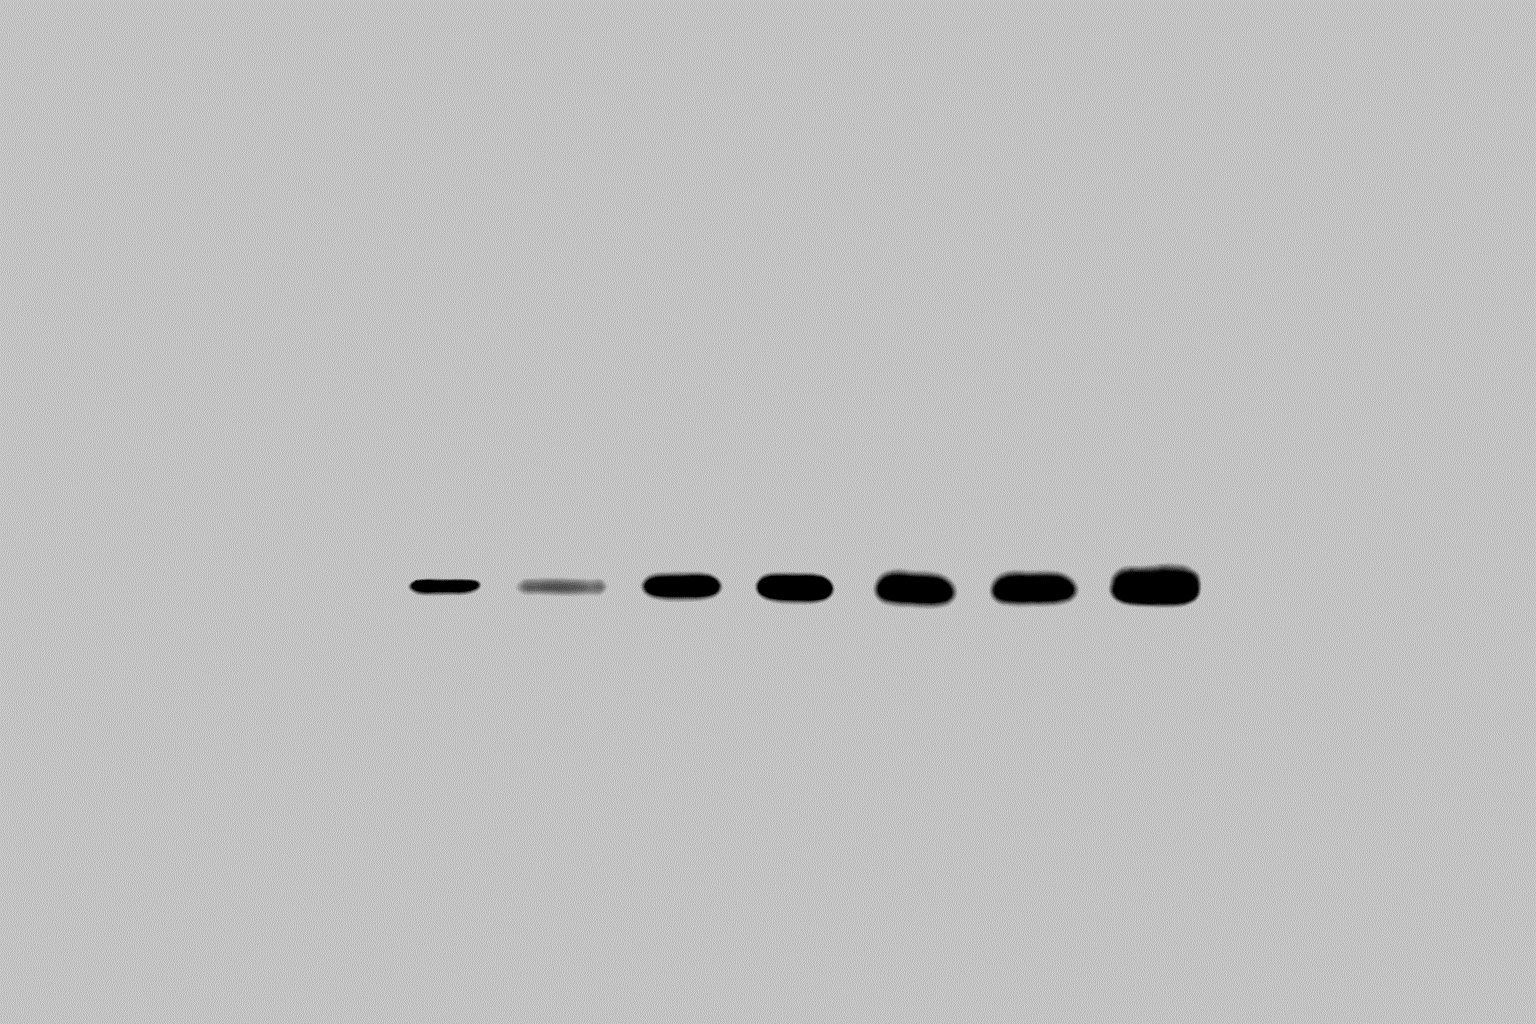

Supplement: Supplementary file 1 [file 2 › S5 Fig.tif]

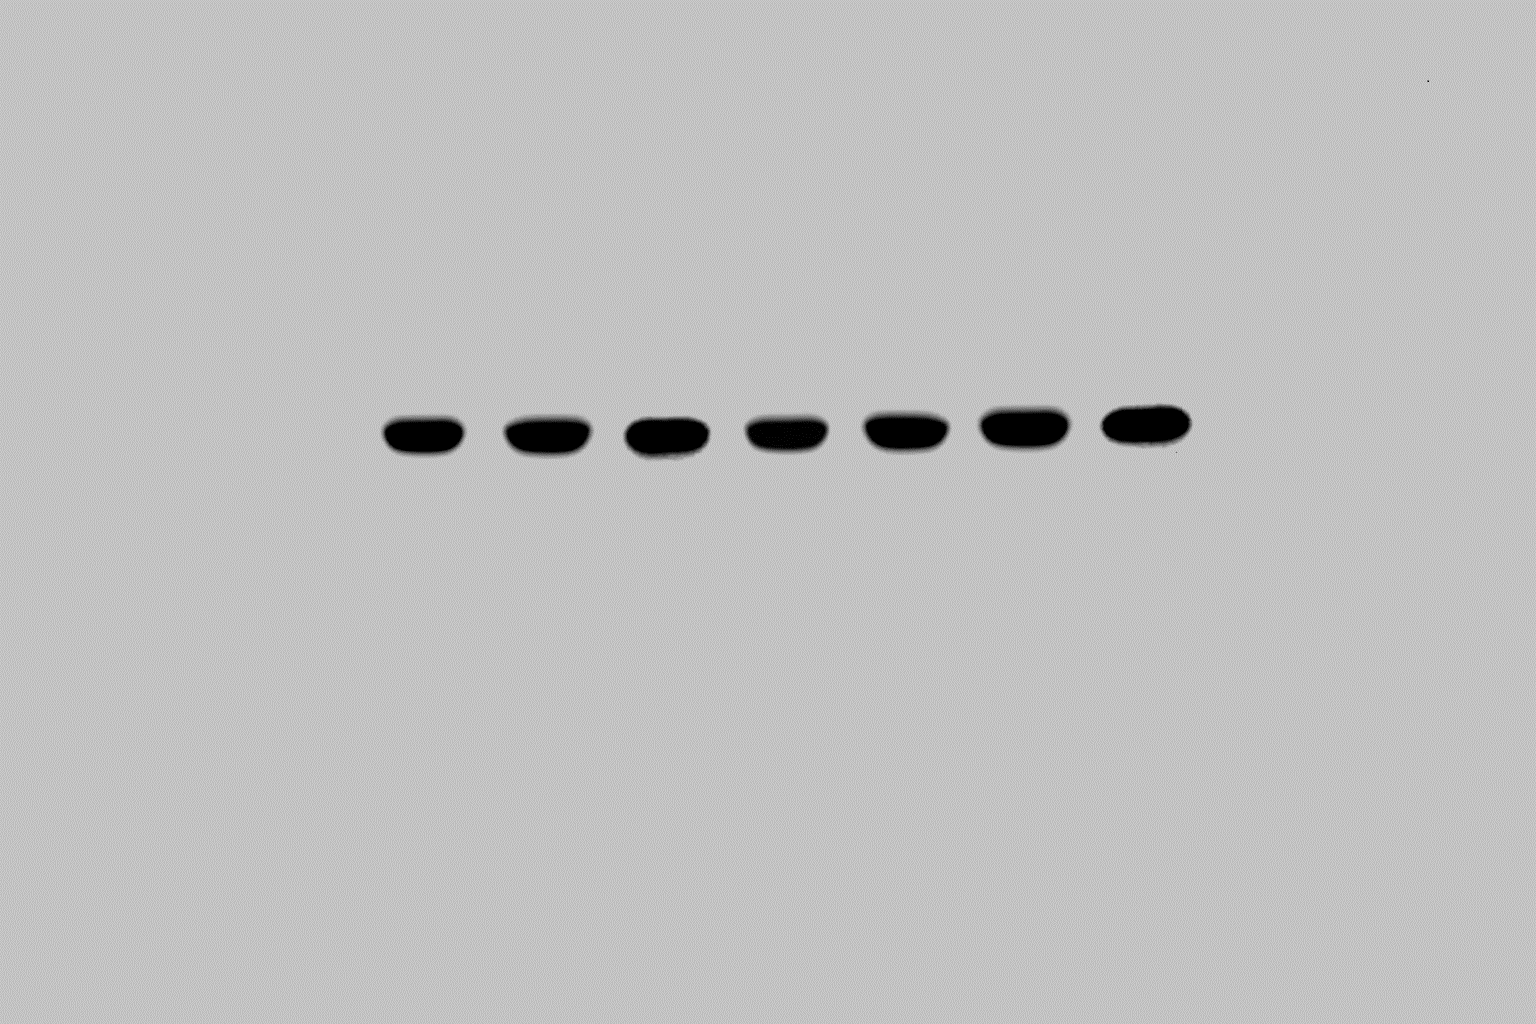

Supplement: Supplementary file 1 [file 2 › S6 Fig.tif]

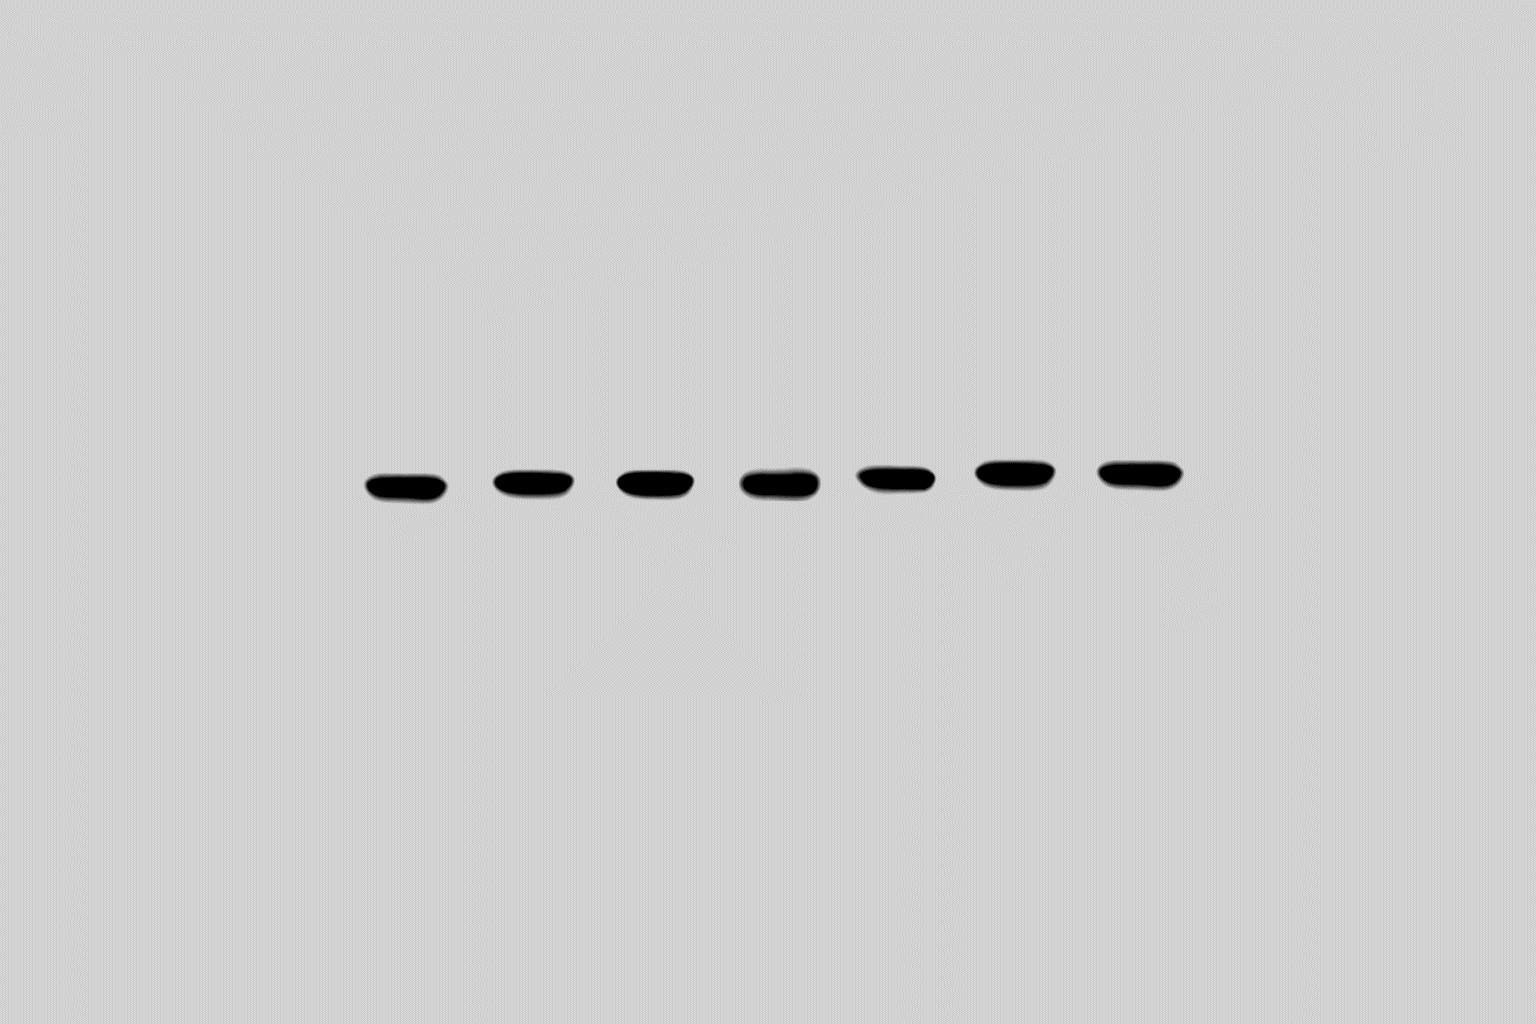

Supplement: Supplementary file 1 [file 2 › S7 Fig.tif]

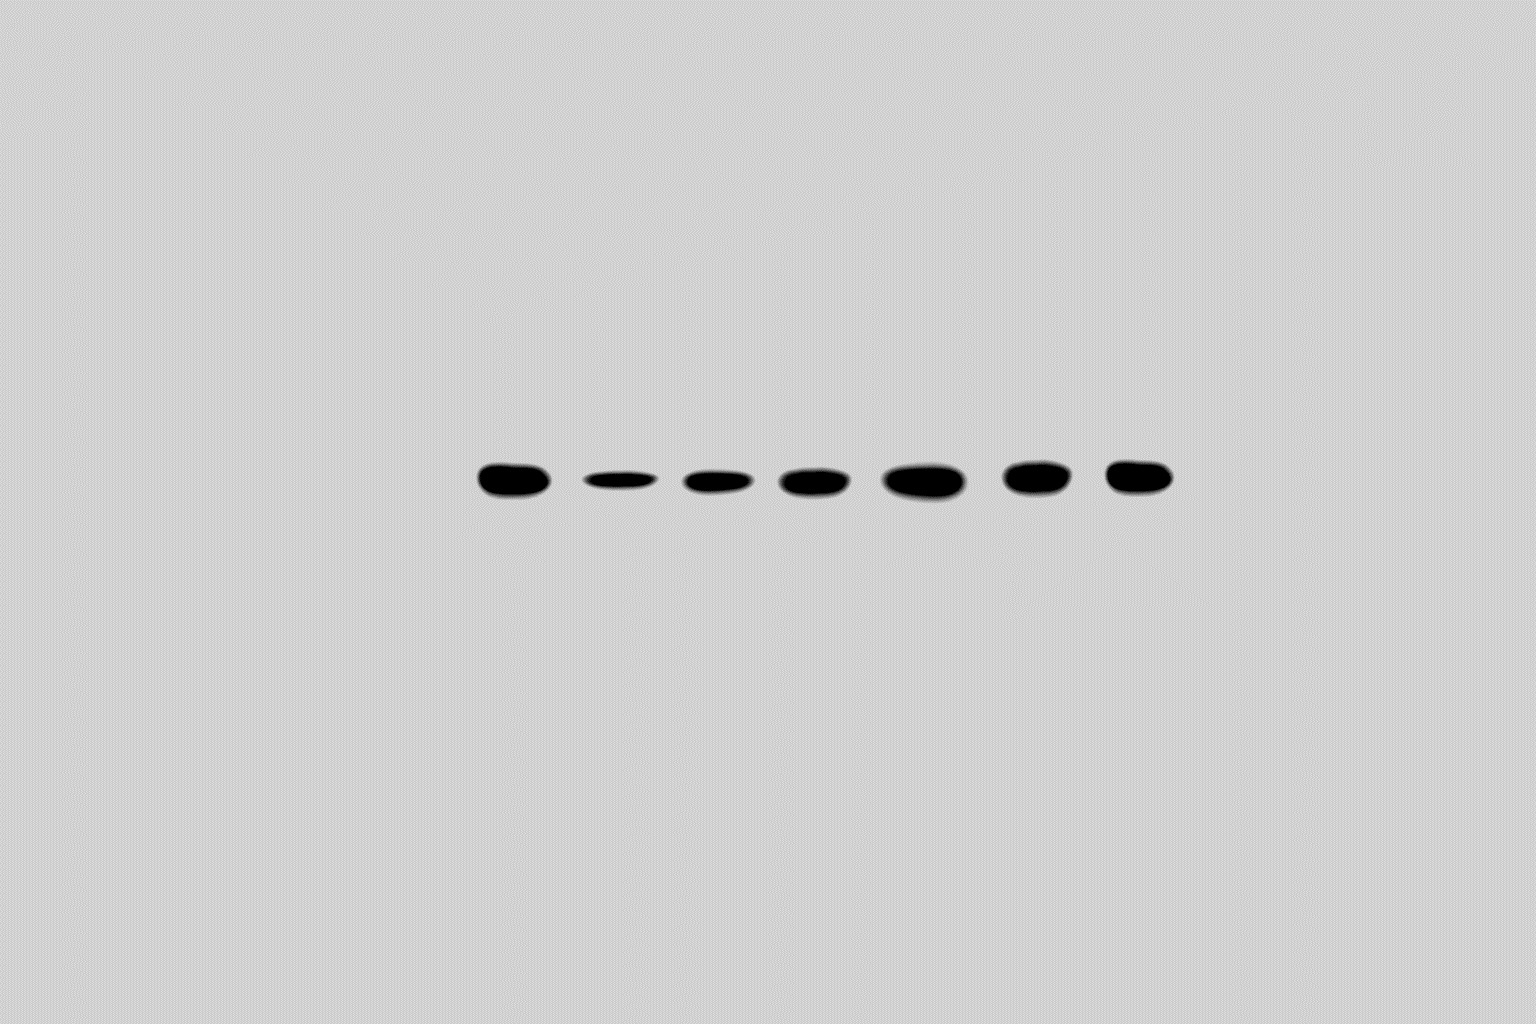

Supplement: Supplementary file 1 [file 2 › S8 Fig.tif]

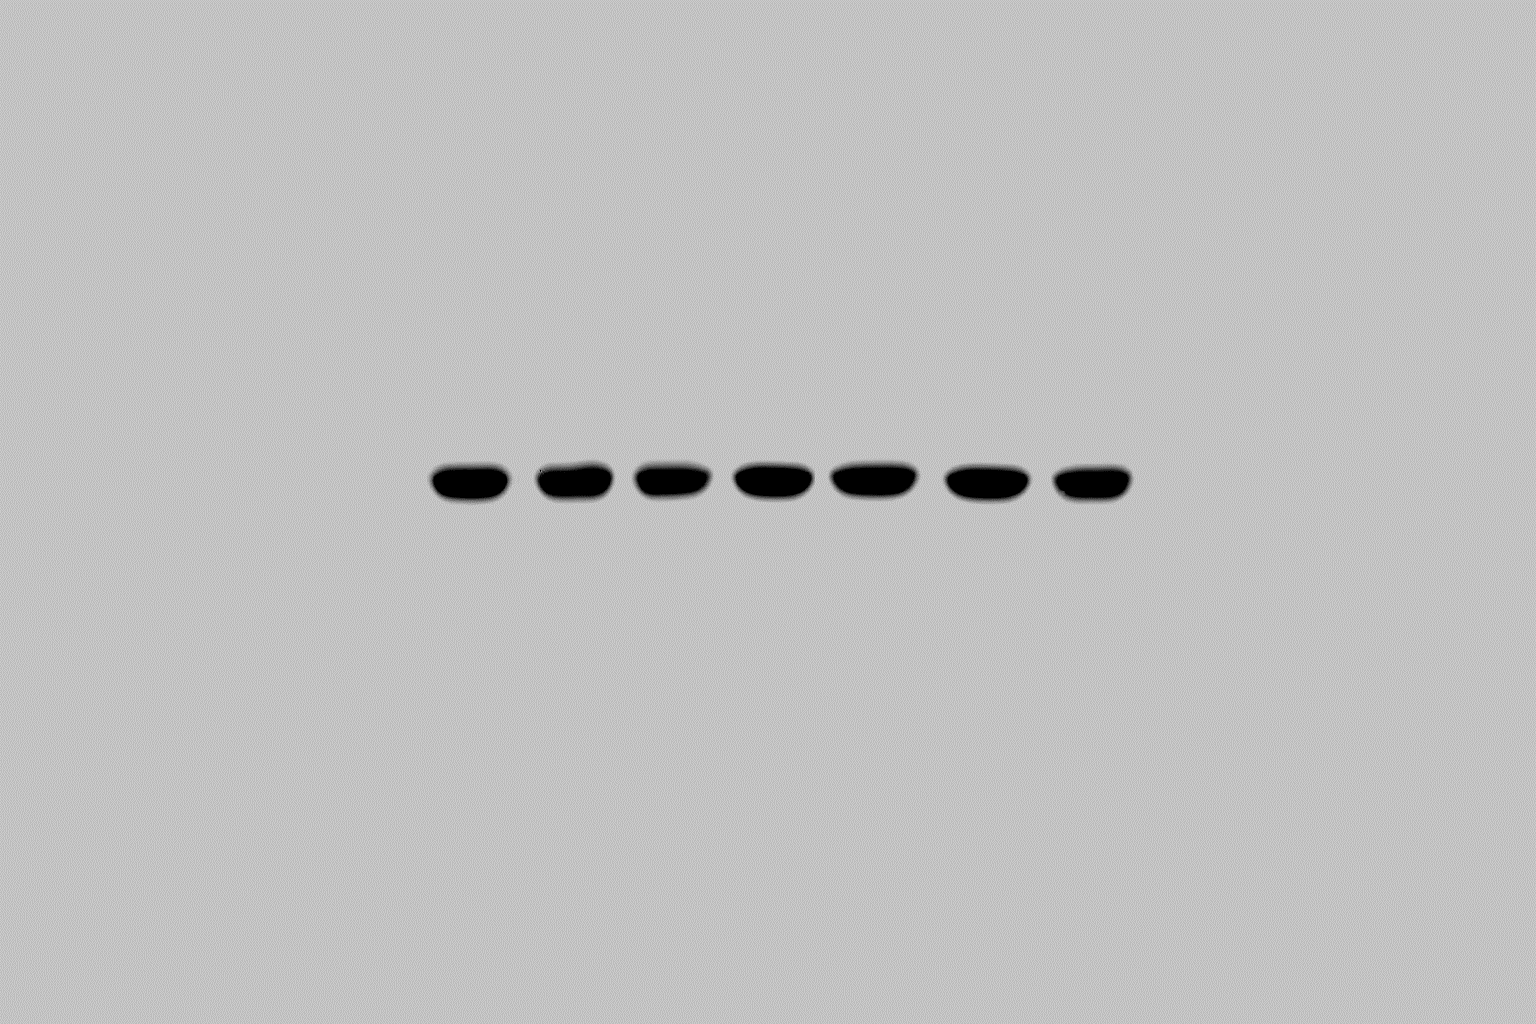

Supplement: Supplementary file 1 [file 2 › S9 Fig.tif]

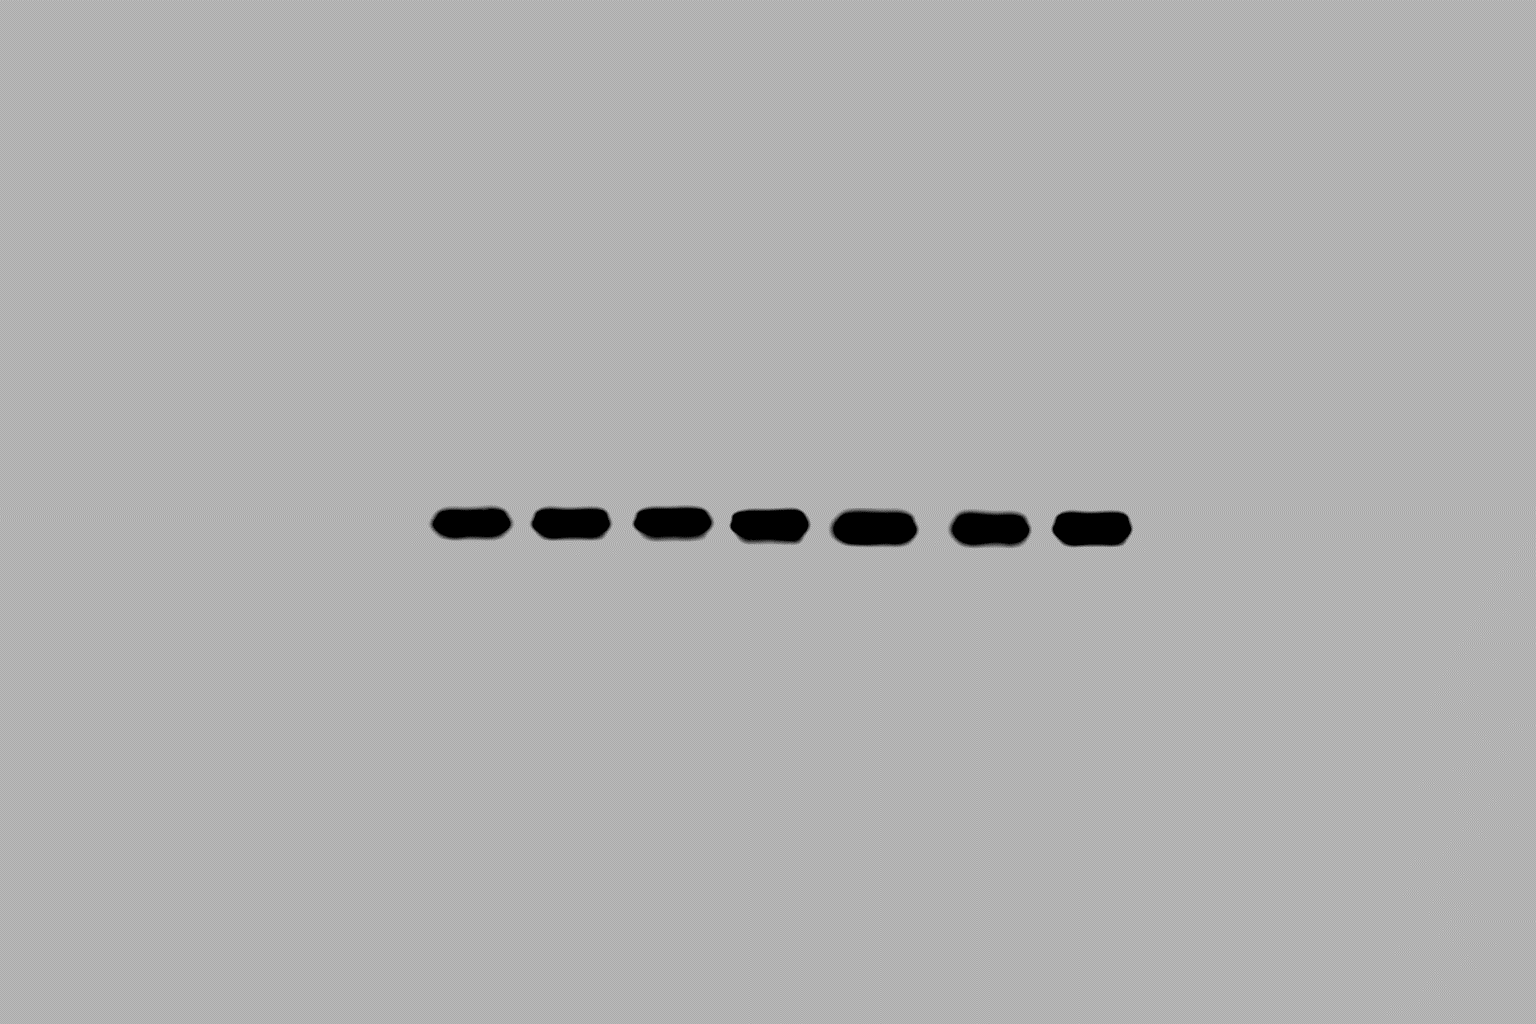

Supplement: Supplementary file 1 [file 2 › S10 Fig.tif]

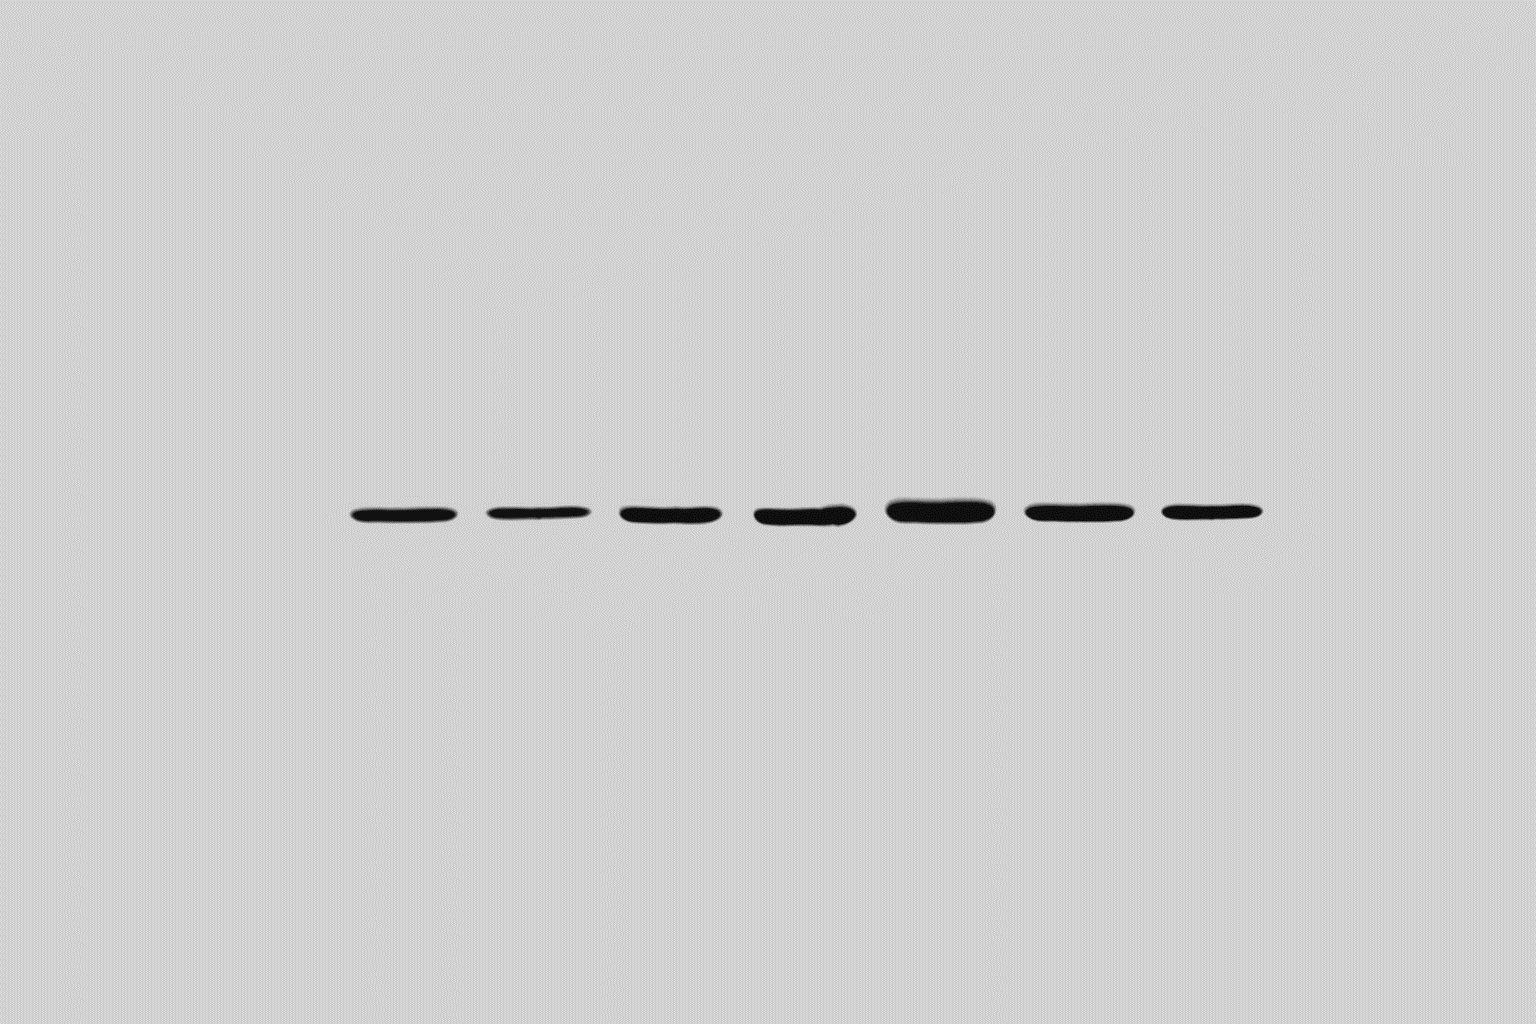

Supplement: Supplementary file 1 [file 2 › S11 Fig.tif]

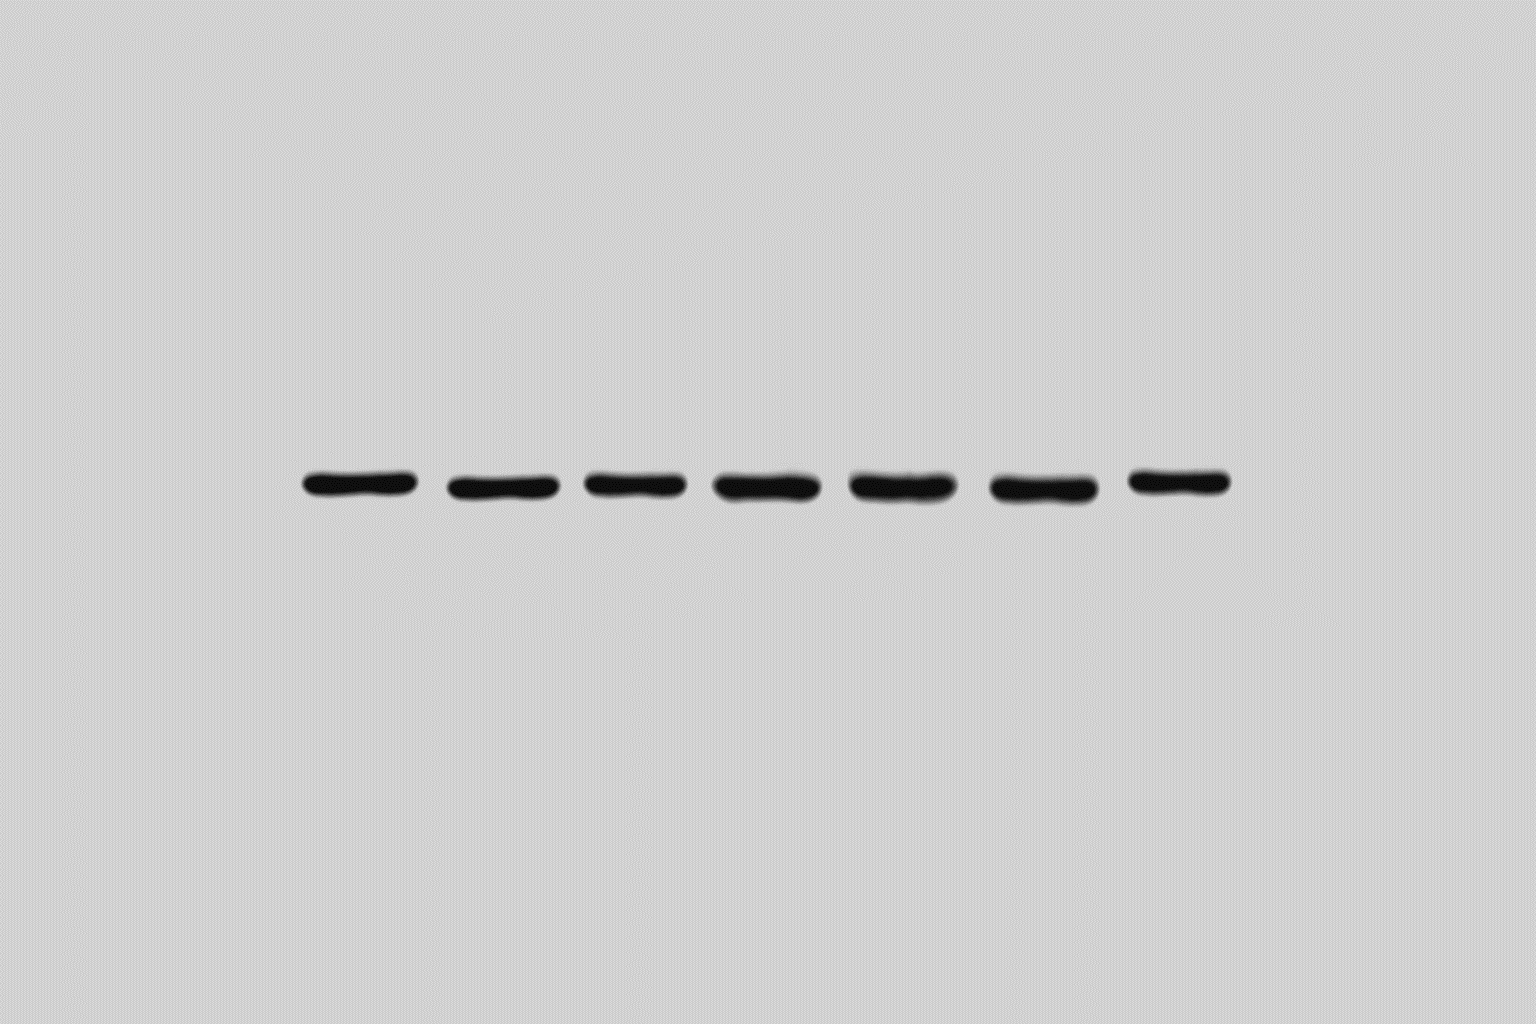

Supplement: Supplementary file 1 [file 2 › S12 Fig.tif]

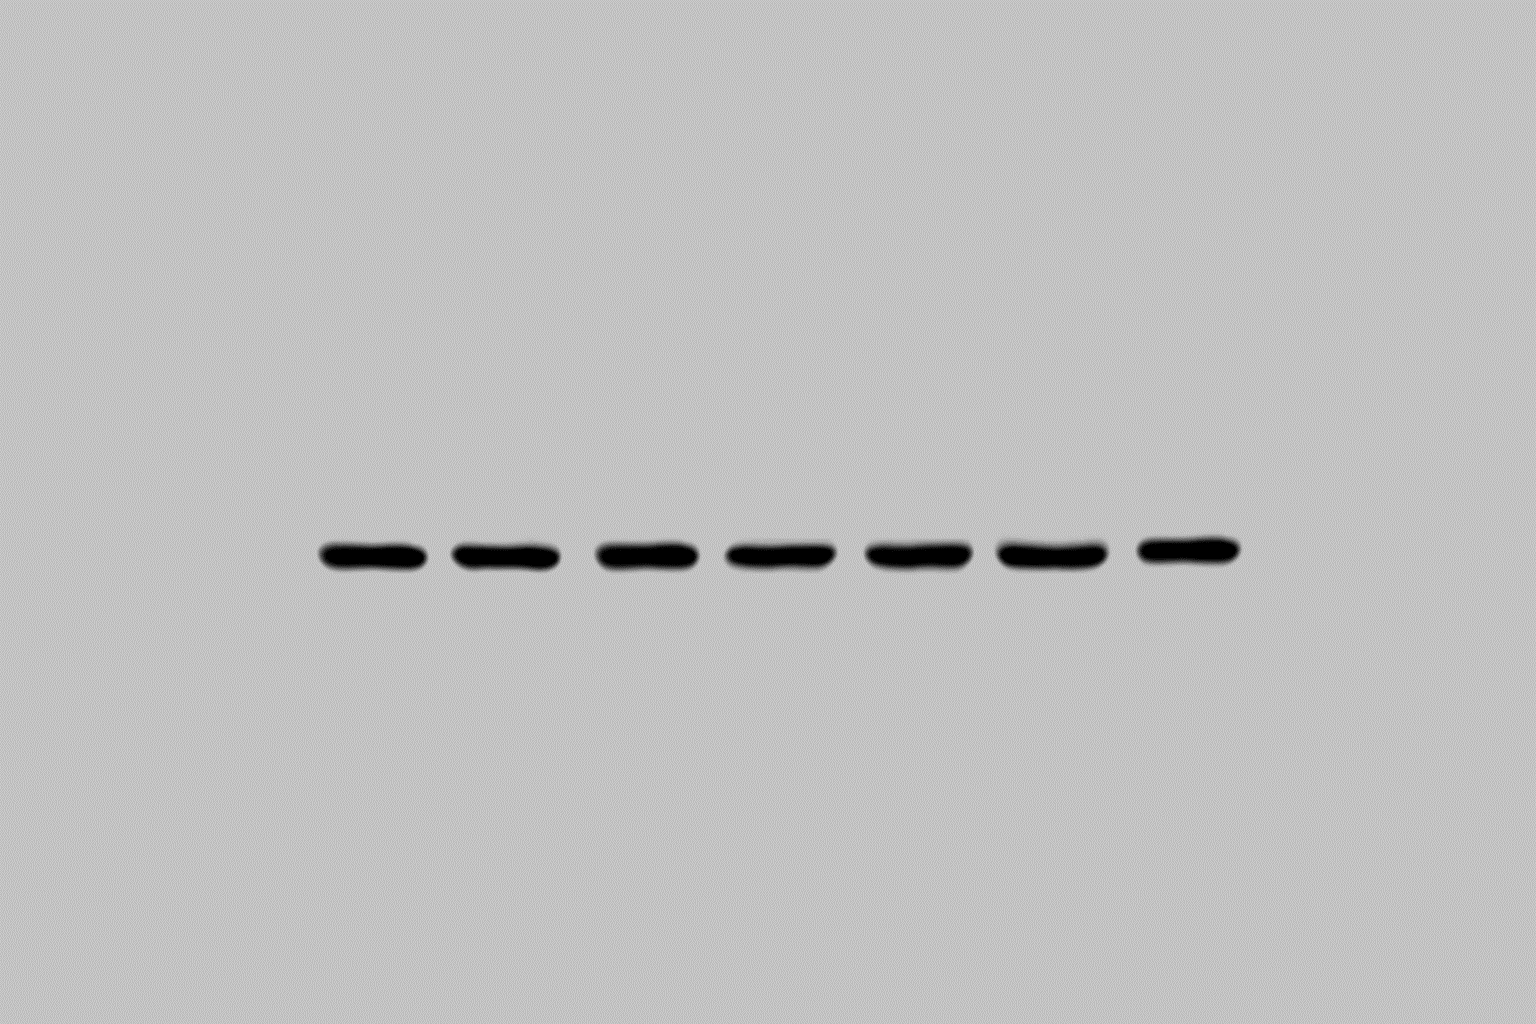

Supplement: Supplementary file 1 [file 2 › S13 Fig.tif]

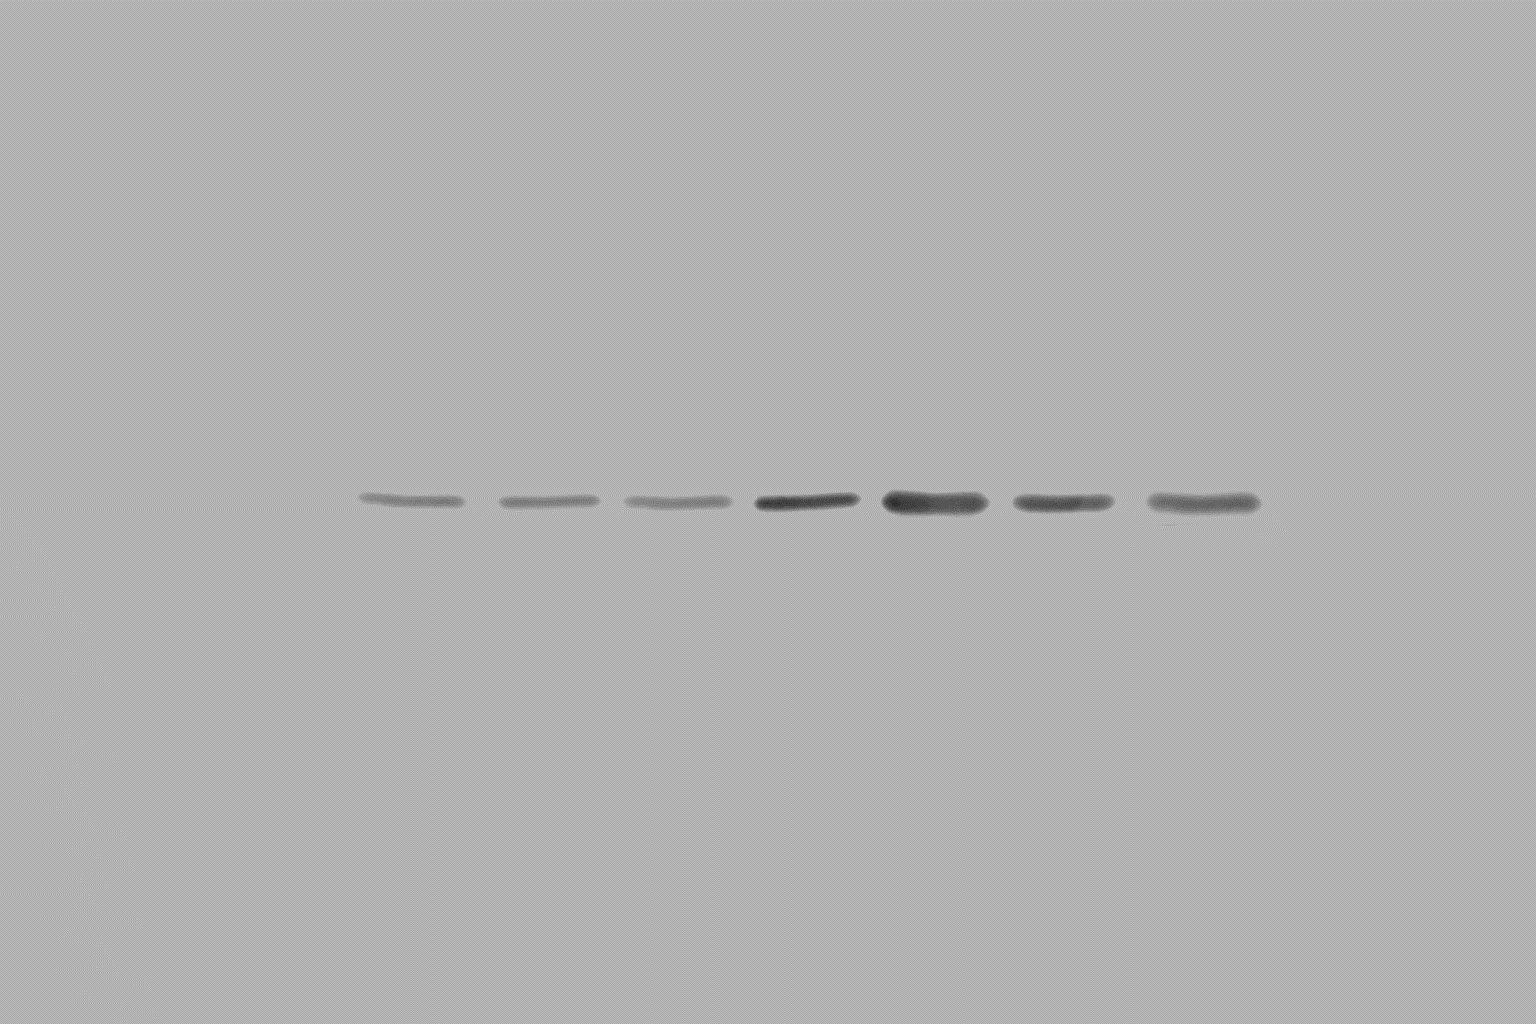

Supplement: Supplementary file 1 [file 2 › S14 Fig.tif]

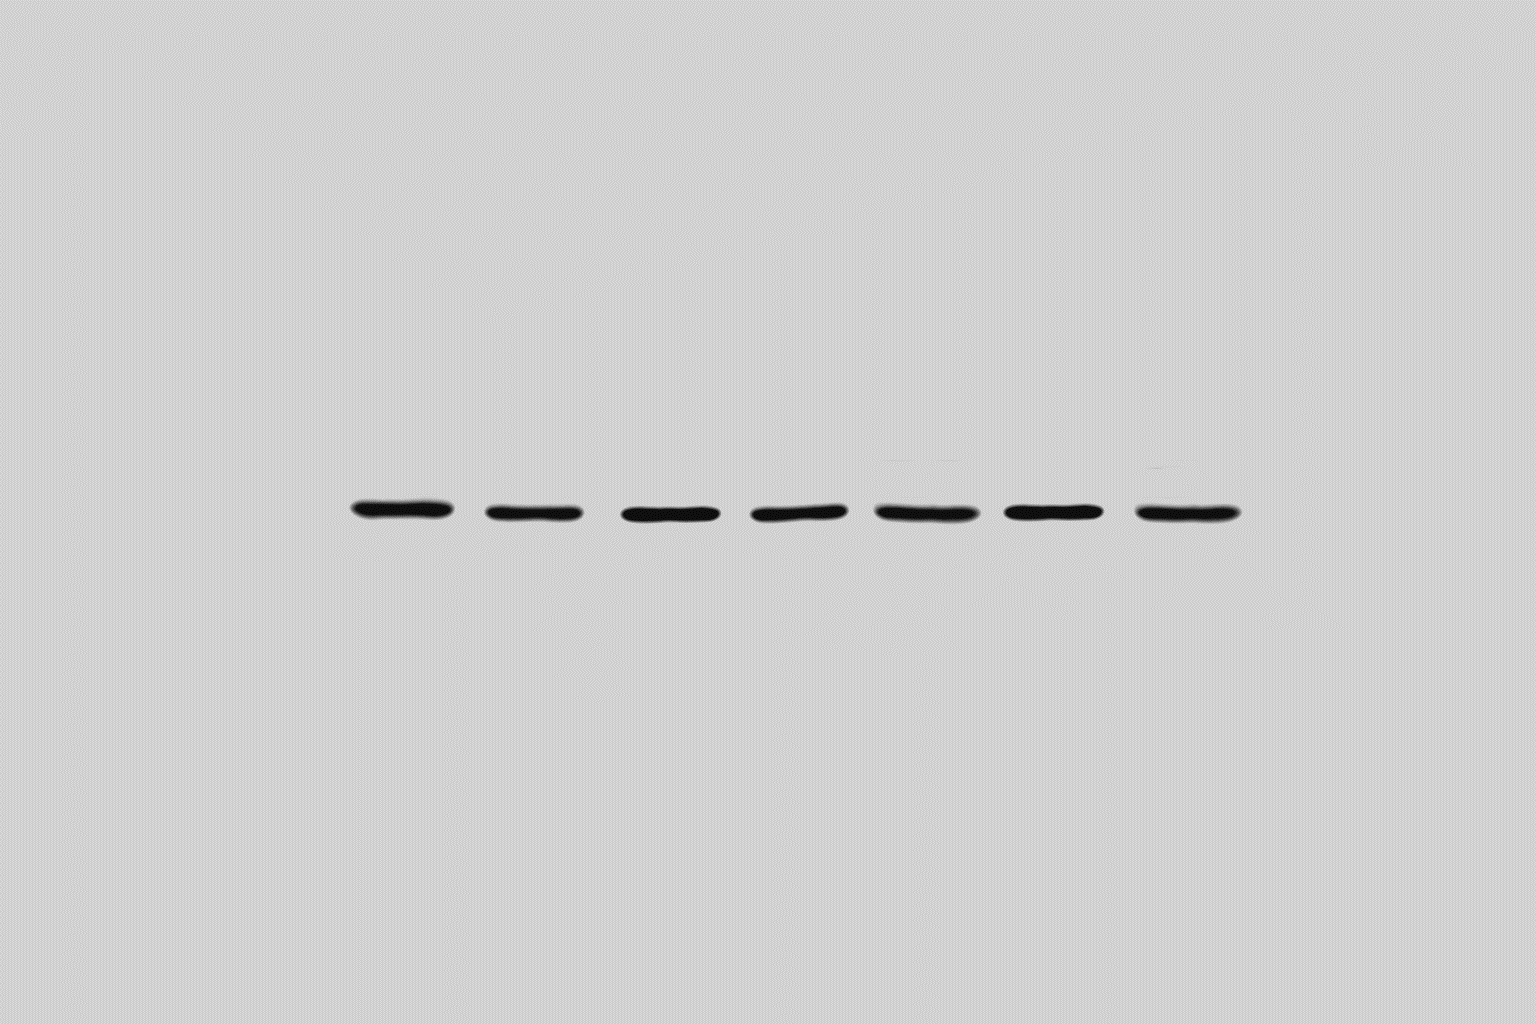

Supplement: Supplementary file 1 [file 2 › S15 Fig.tif]

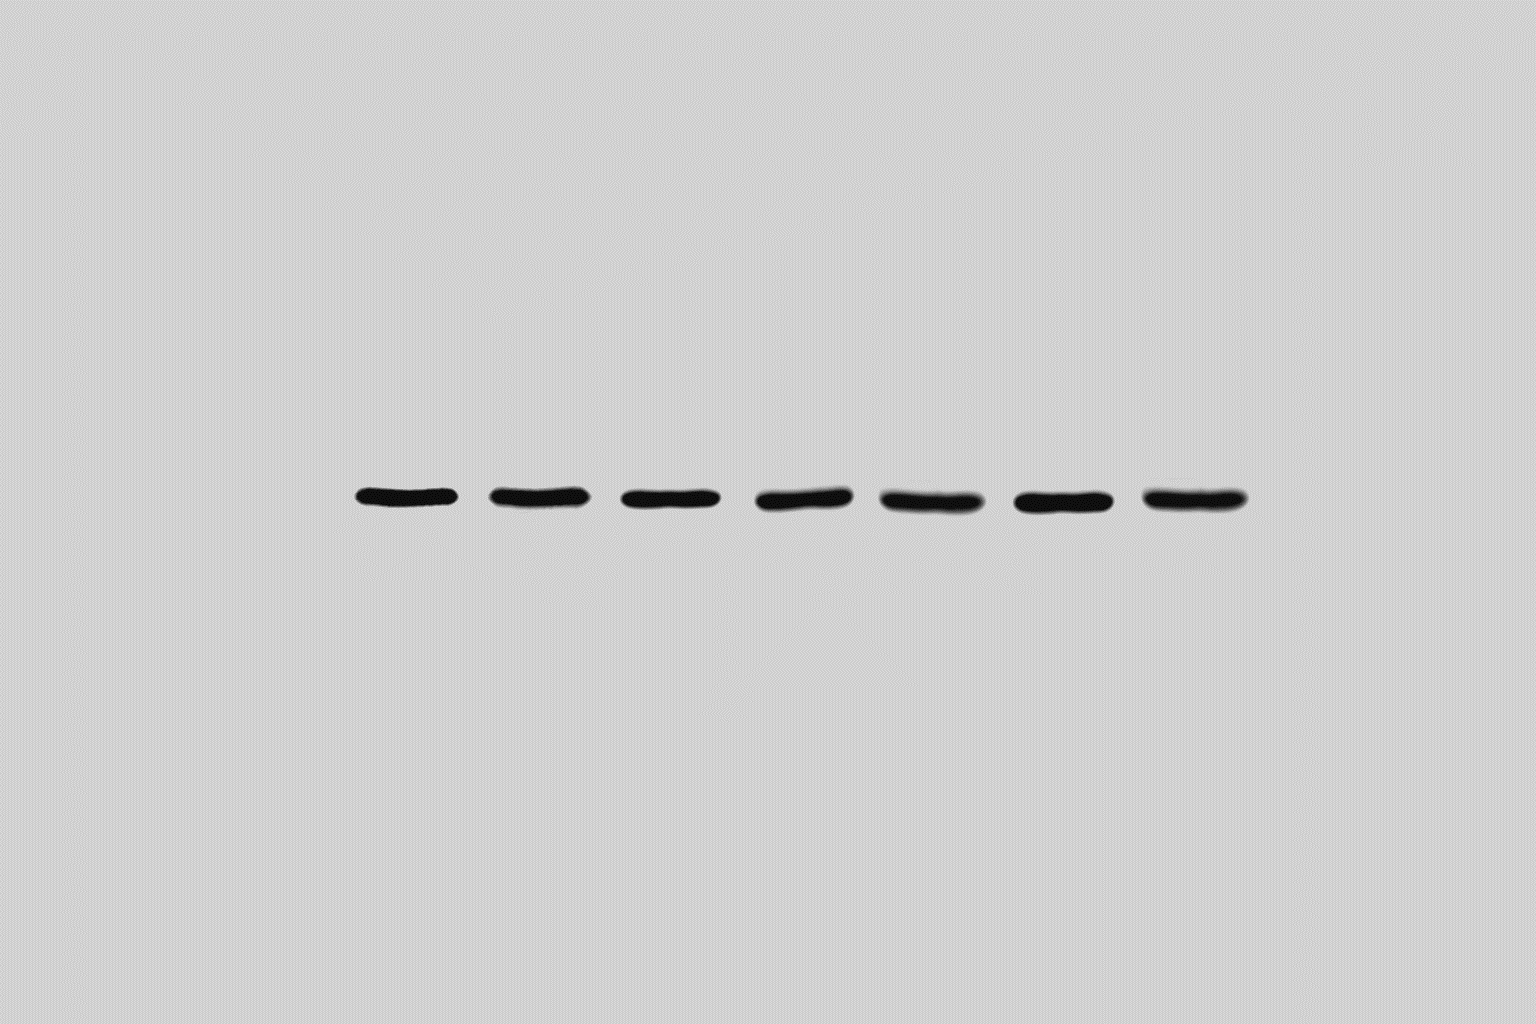

Supplement: Supplementary file 1 [file 2 › S16 Fig.tif]

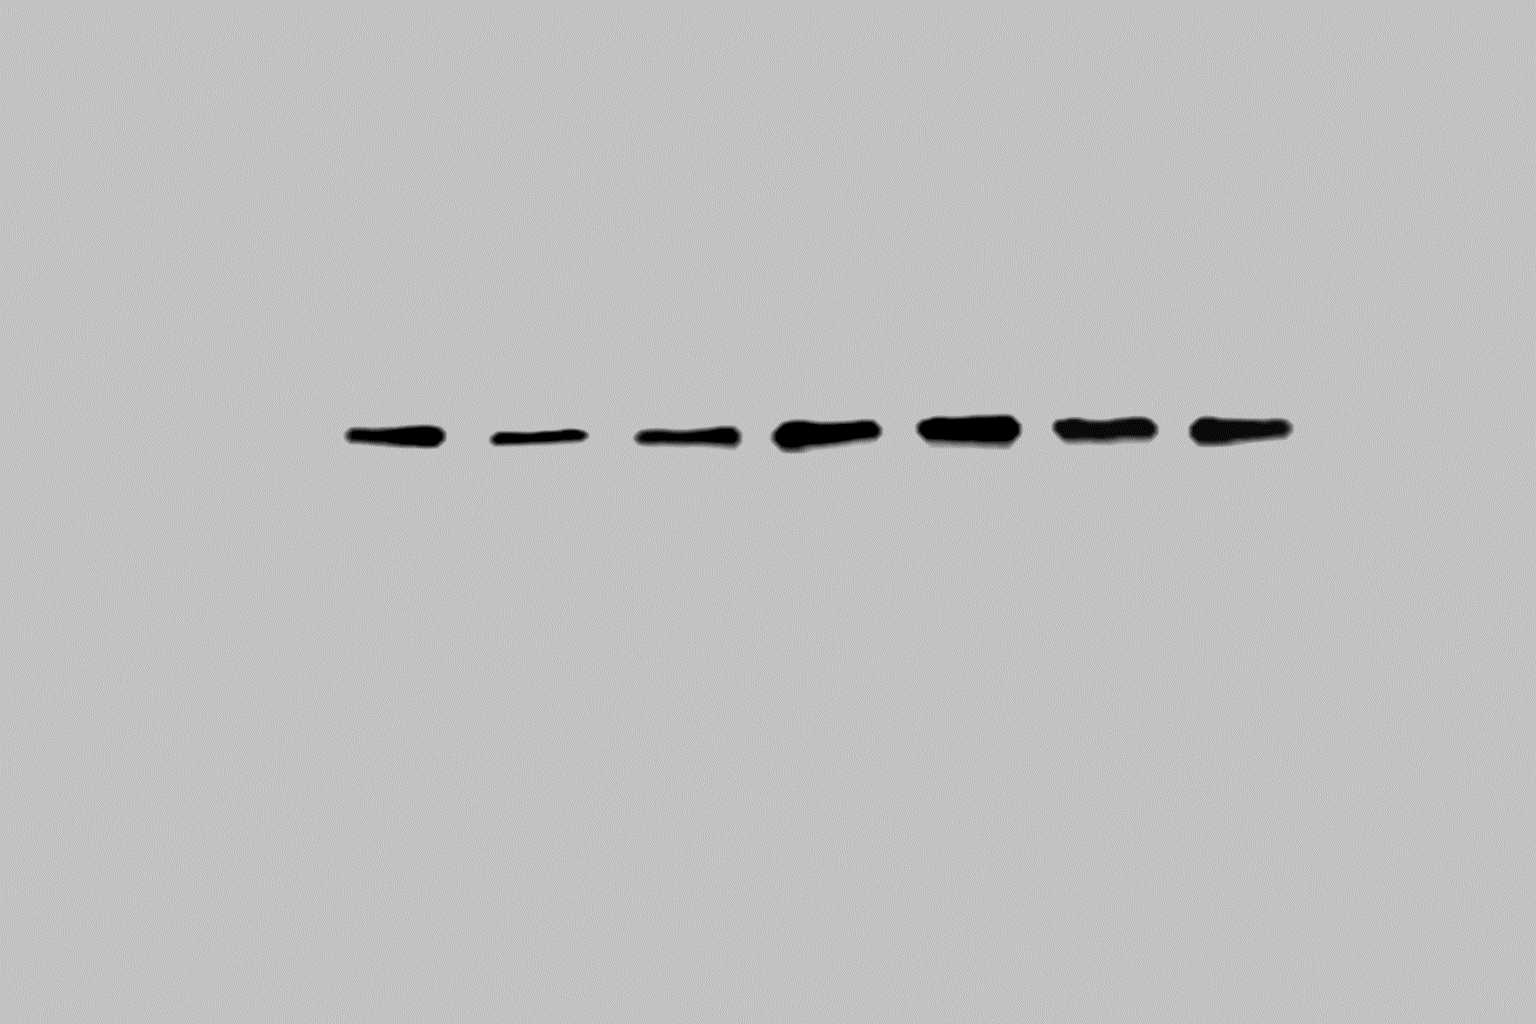

Supplement: Supplementary file 1 [file 2 › S17 Fig.tif]

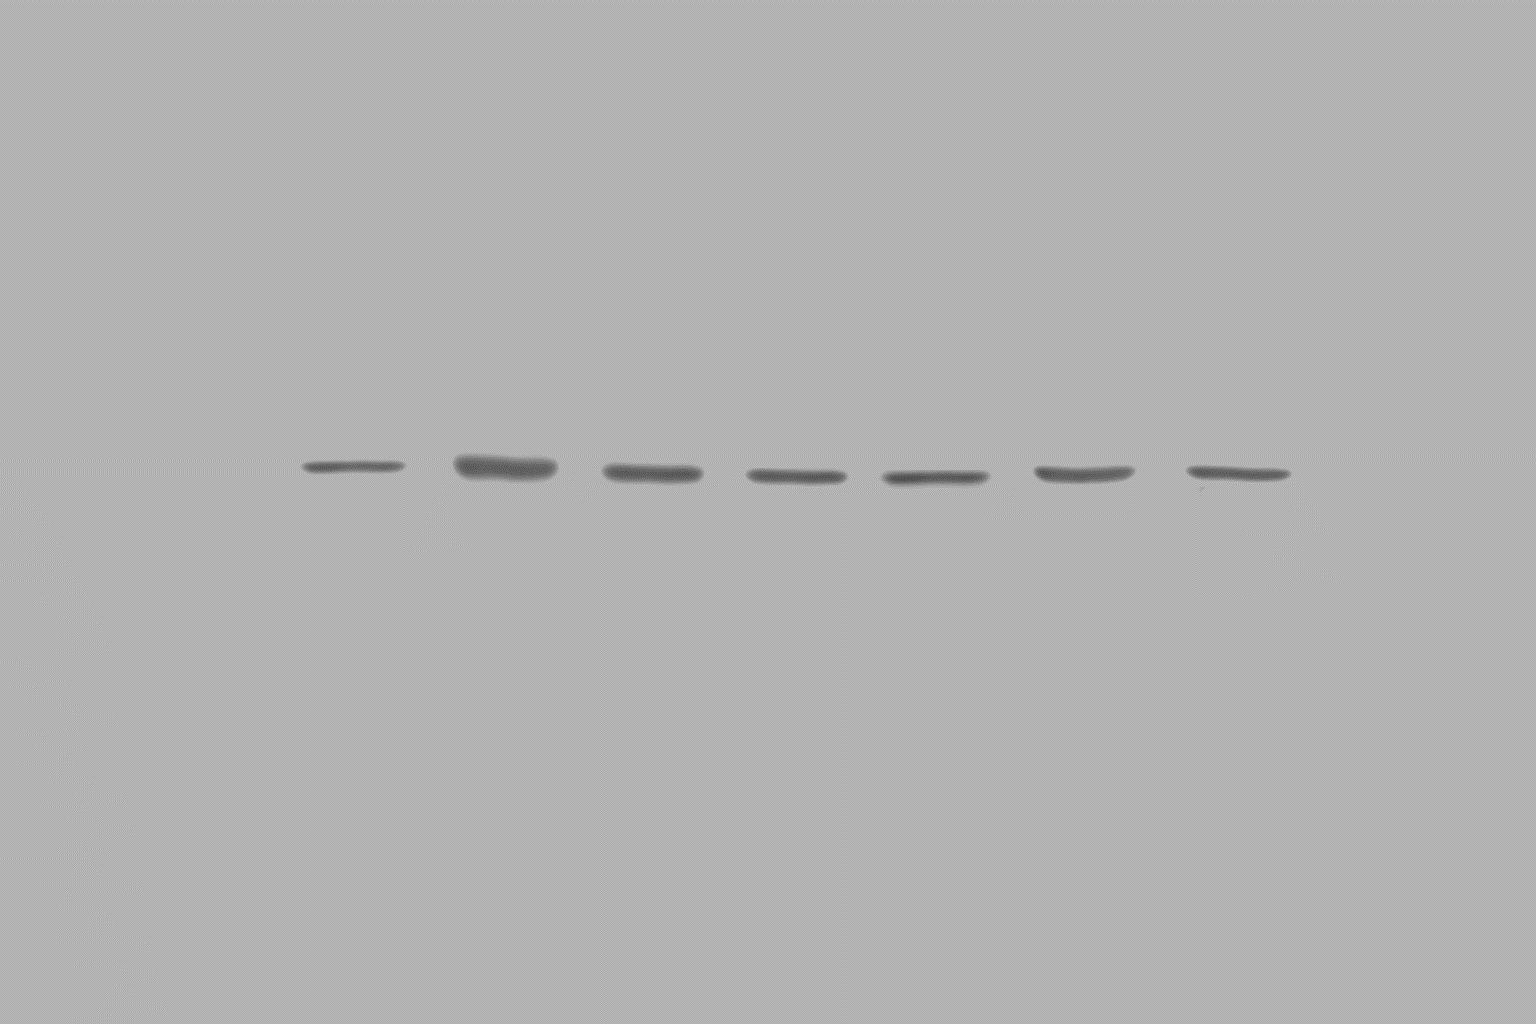

Supplement: Supplementary file 1 [file 2 › S18 Fig.tif]

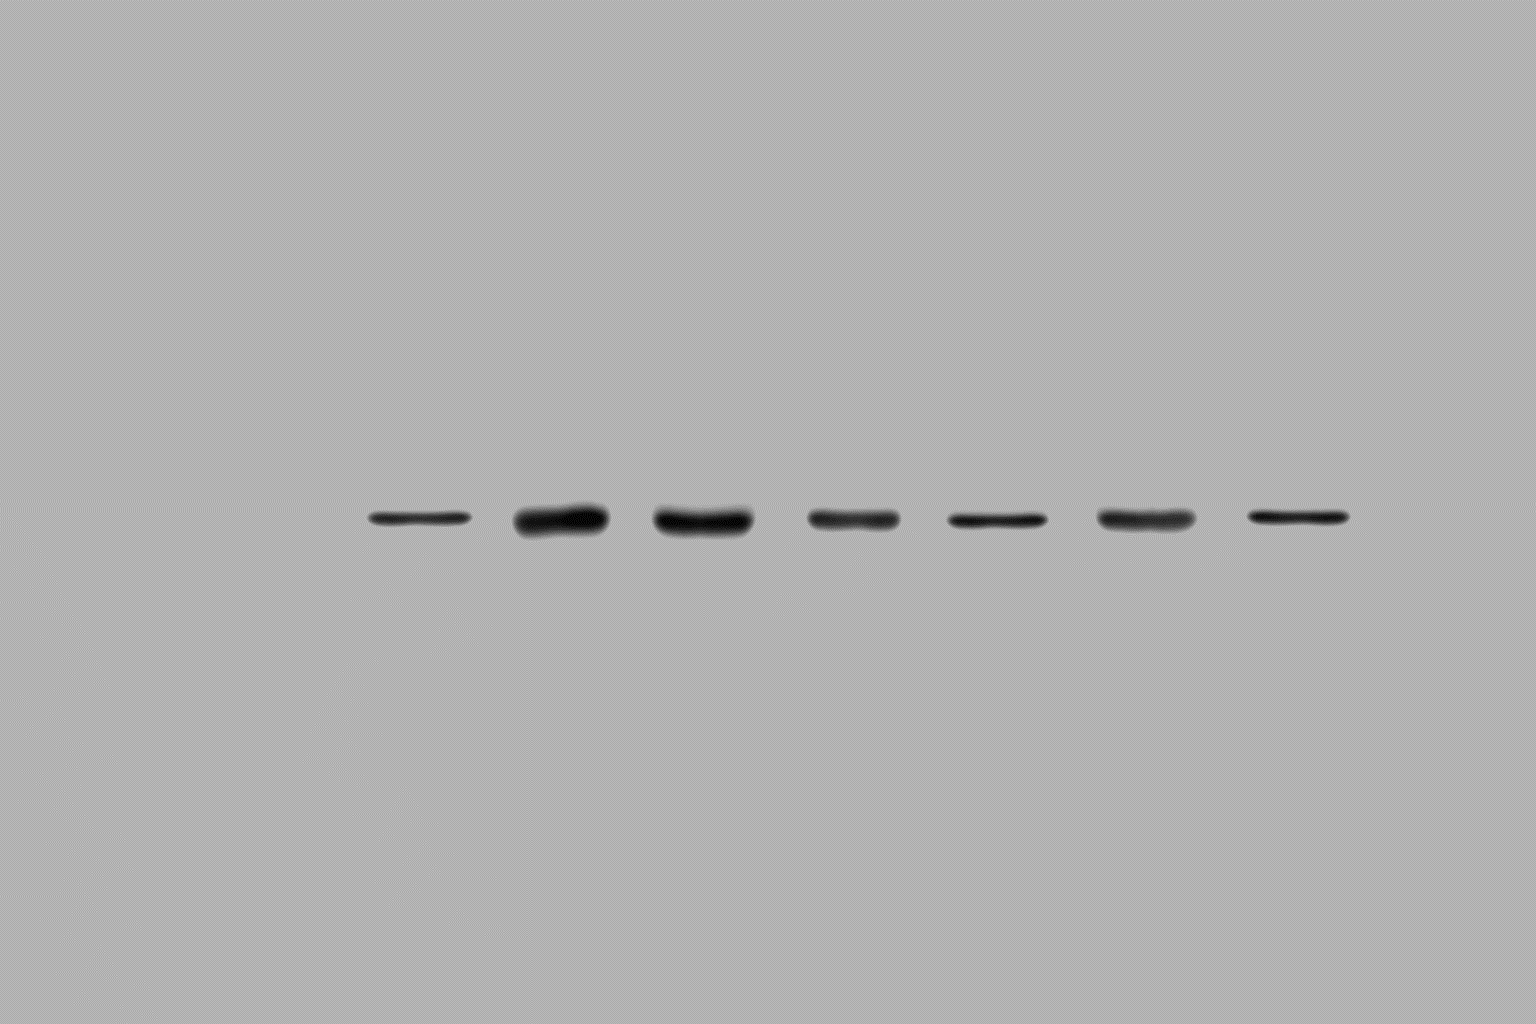

Supplement: Supplementary file 1 [file 2 › S19 Fig.tif]

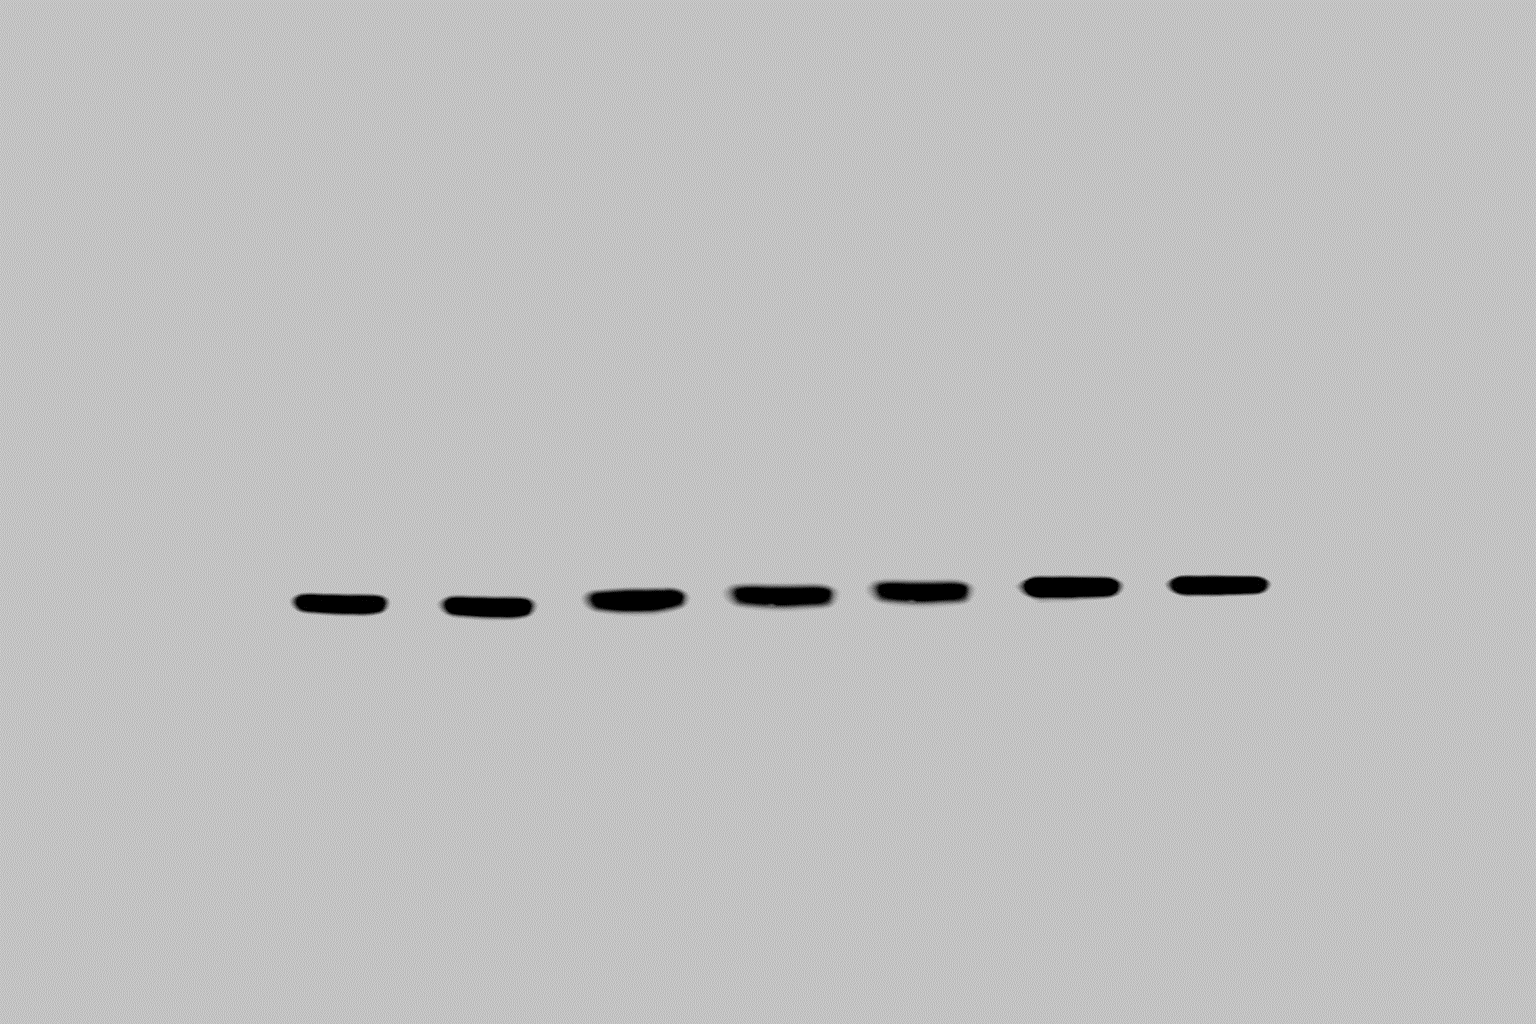

Supplement: Supplementary file 1 [file 2 › S20 Fig.tif]

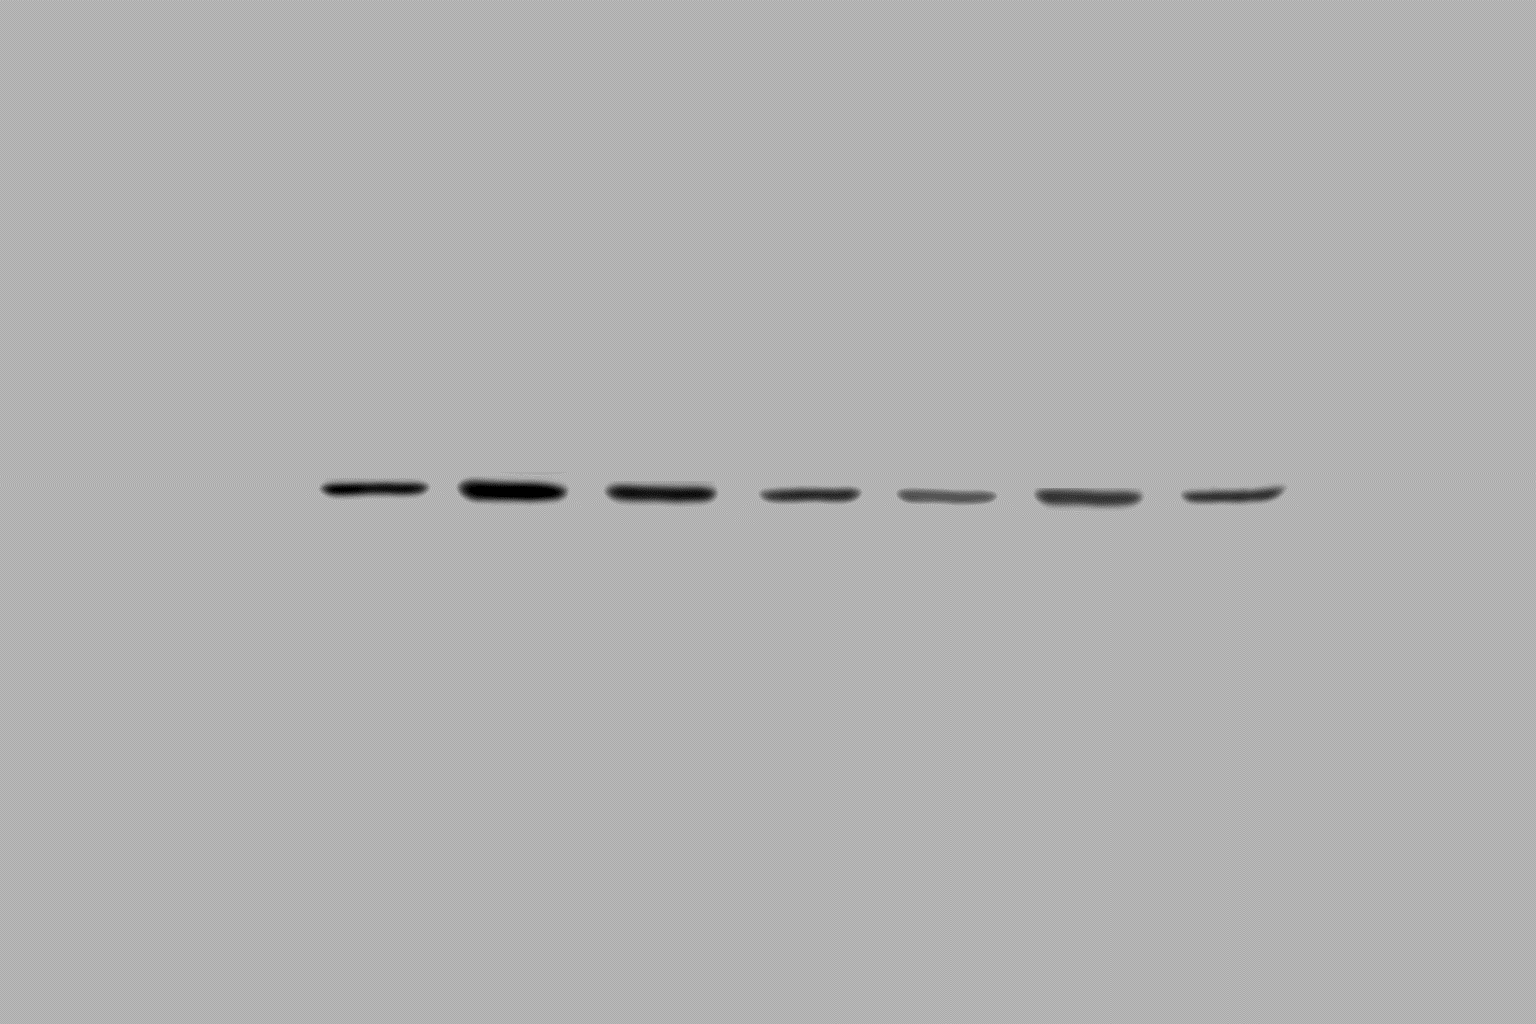

Supplement: Supplementary file 1 [file 2 › S21 Fig.tif]

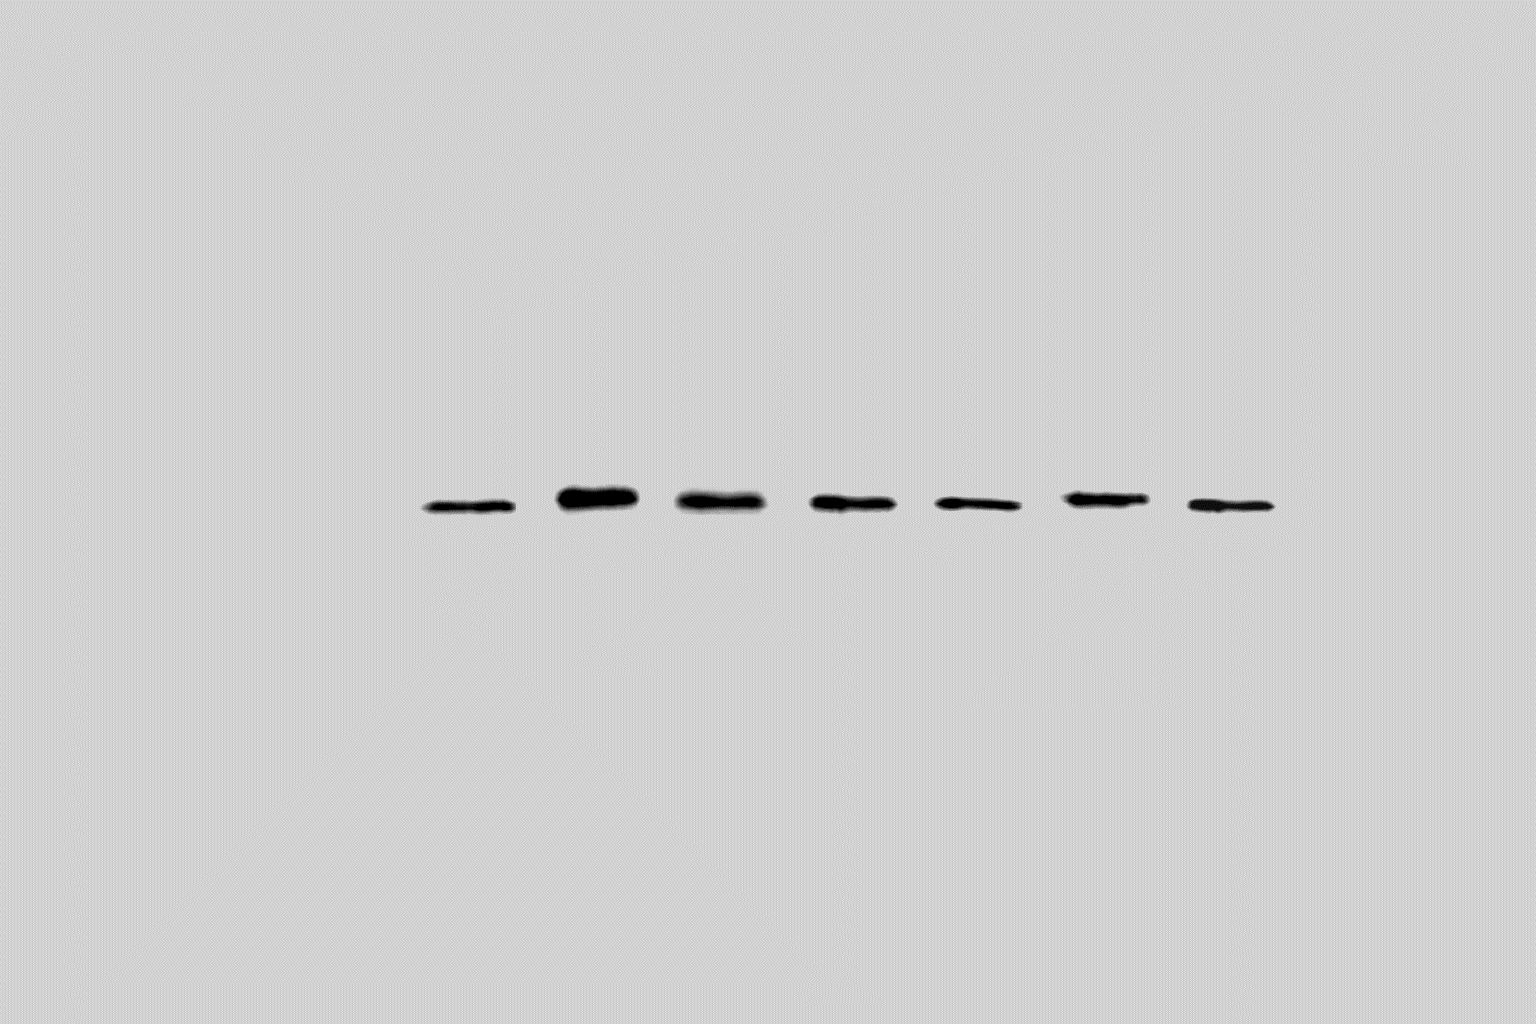

Supplement: Supplementary file 1 [file 2 › S22 Fig.tif]

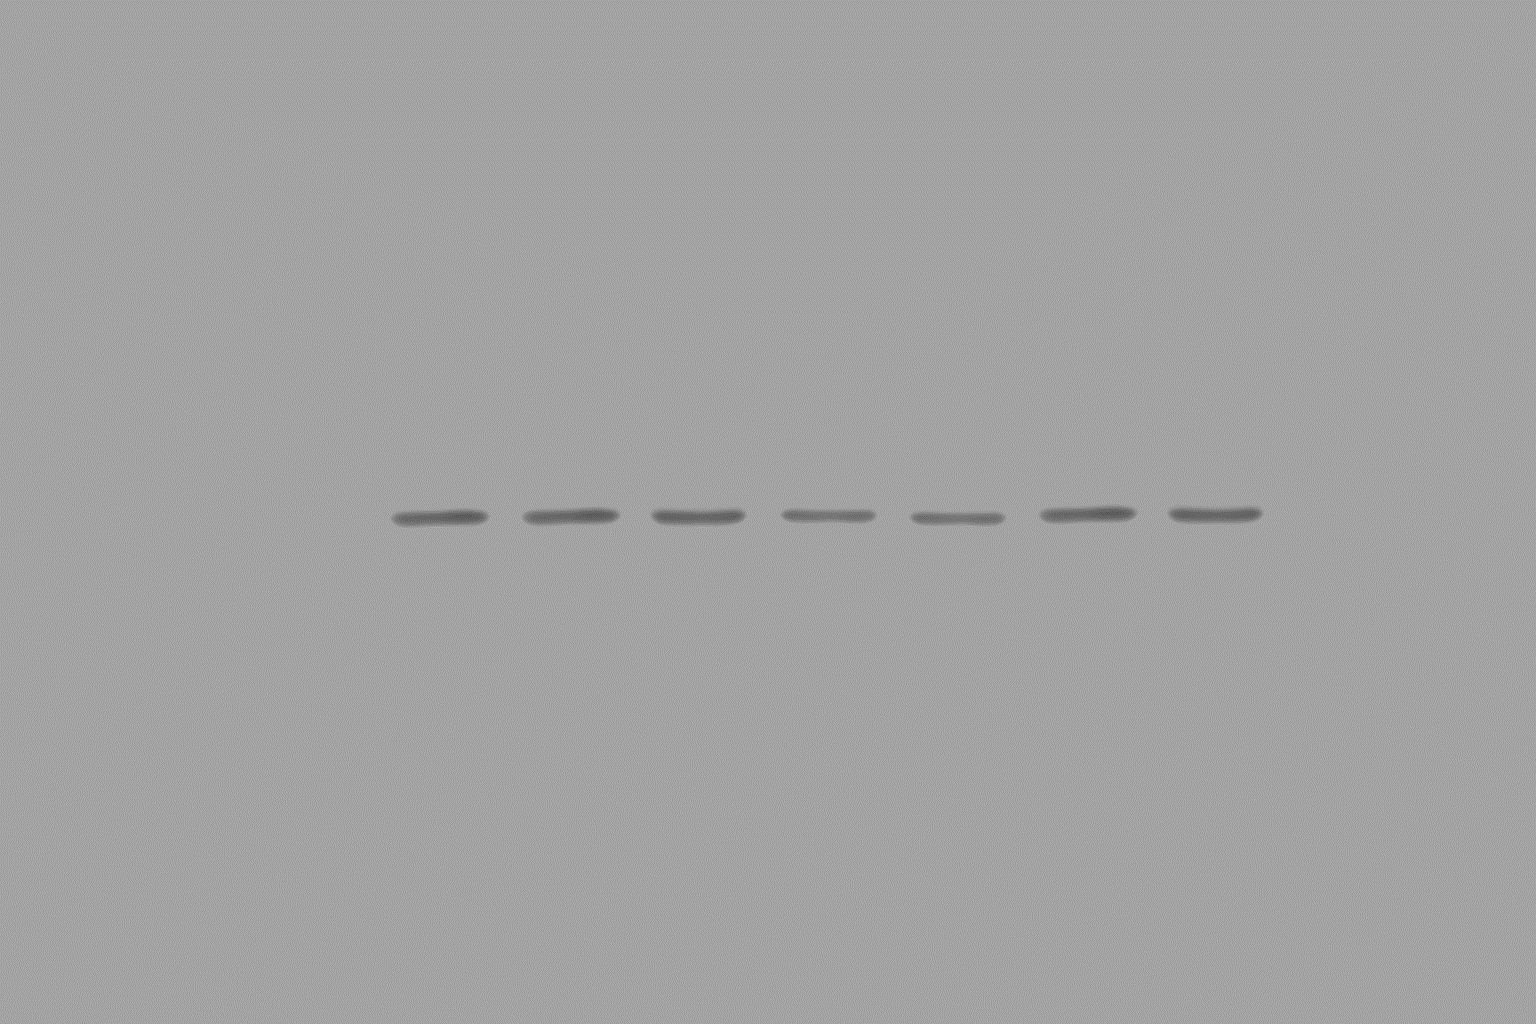

Supplement: Supplementary file 1 [file 2 › S23 Fig.tif]
